# Supplementary material for: Iron-Doped ZnO Nanoparticles as Multifunctional Nanoplatforms for Theranostics
Source: MDPI journal article supplement (doi:10.3390/nano11102628), 2021-10-06
Supplement: s1 [file s1]

## Supporting Information

# Iron-Doped ZnO Nanoparticles as Multifunctional Nanoplatforms for Theranostics

Marco Carofiglio, Marco Laurenti, Veronica Vighetto, Luisa Racca, Sugata Barui, Nadia Garino, Roberto Gerbaldo, Francesco Laviano and Valentina Cauda \*

Department of Applied Science and Technology, Politecnico di Torino, C.so Duca degli Abruzzi 24,  
10129 Turin, Italy; marco.carofiglio@polito.it (M.C.); marco.laurenti@polito.it (M.L.);  
veronica.vighetto@polito.it (V.V.); luisa.racca@polito.it (L.R.); sugata.barui@polito.it (S.B.);  
nadia.garino@polito.it (N.G.); roberto.gerbaldo@polito.it (R.G.); francesco.laviano@polito.it (F.L.)

\* Correspondence: valentina.cauda@polito.it; Tel.: +39-011-090-7389

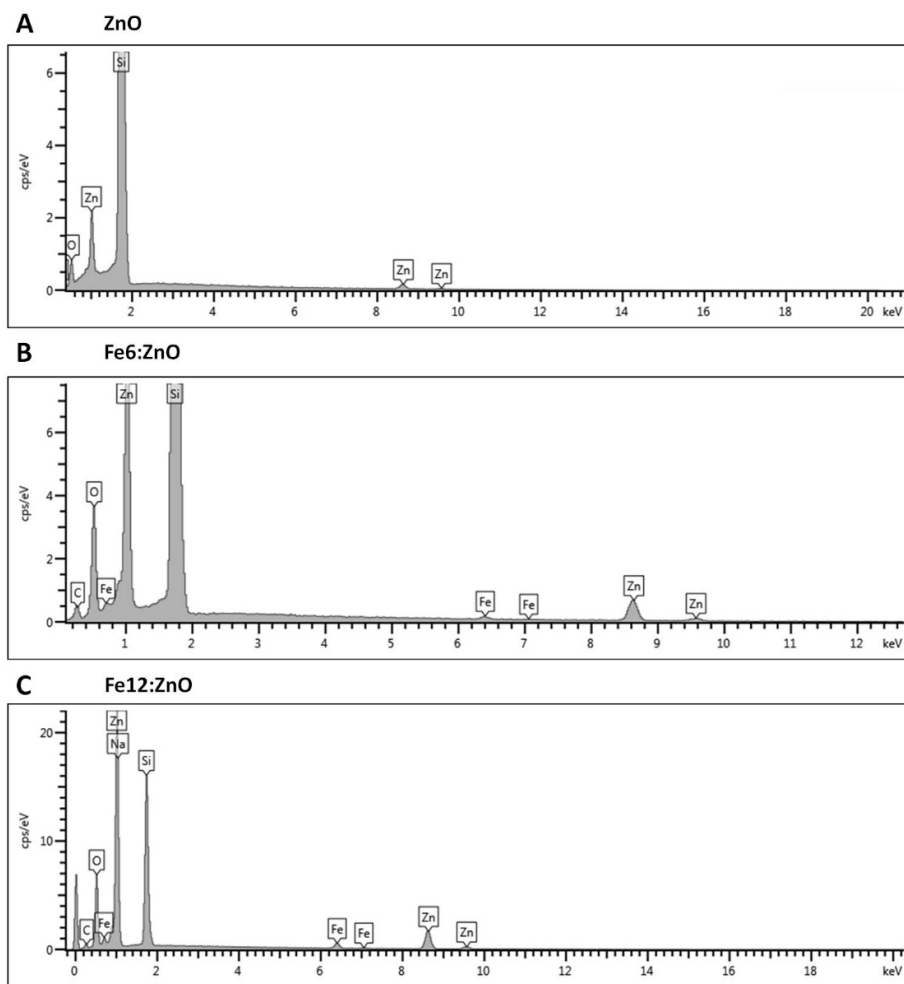

**Figure S1.** Electron dispersive energy spectroscopy spectra of 0 at.% (A), 6 at.% (B) and 12 at.% (C) iron-doped nanoparticles (Fe:ZnO).

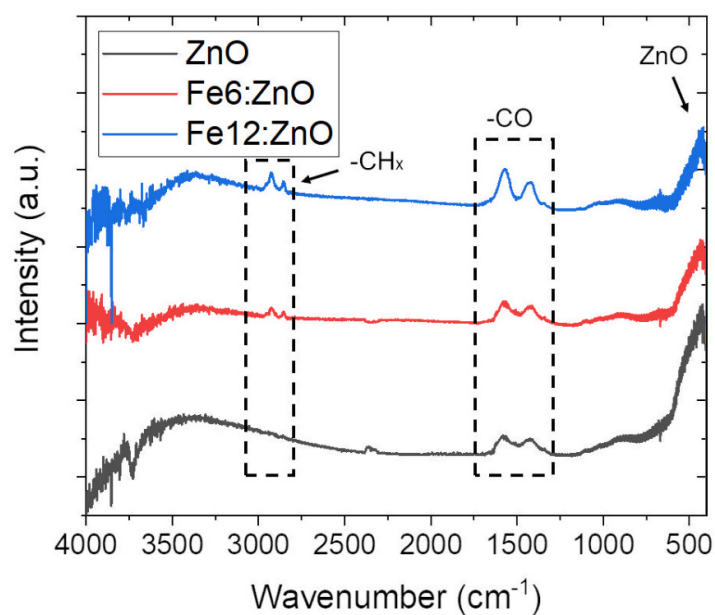

**Figure S2.** Fourier transform infrared spectroscopy spectra of ZnO and Fe:ZnO nanoparticles prior to amino-propyl functionalization.

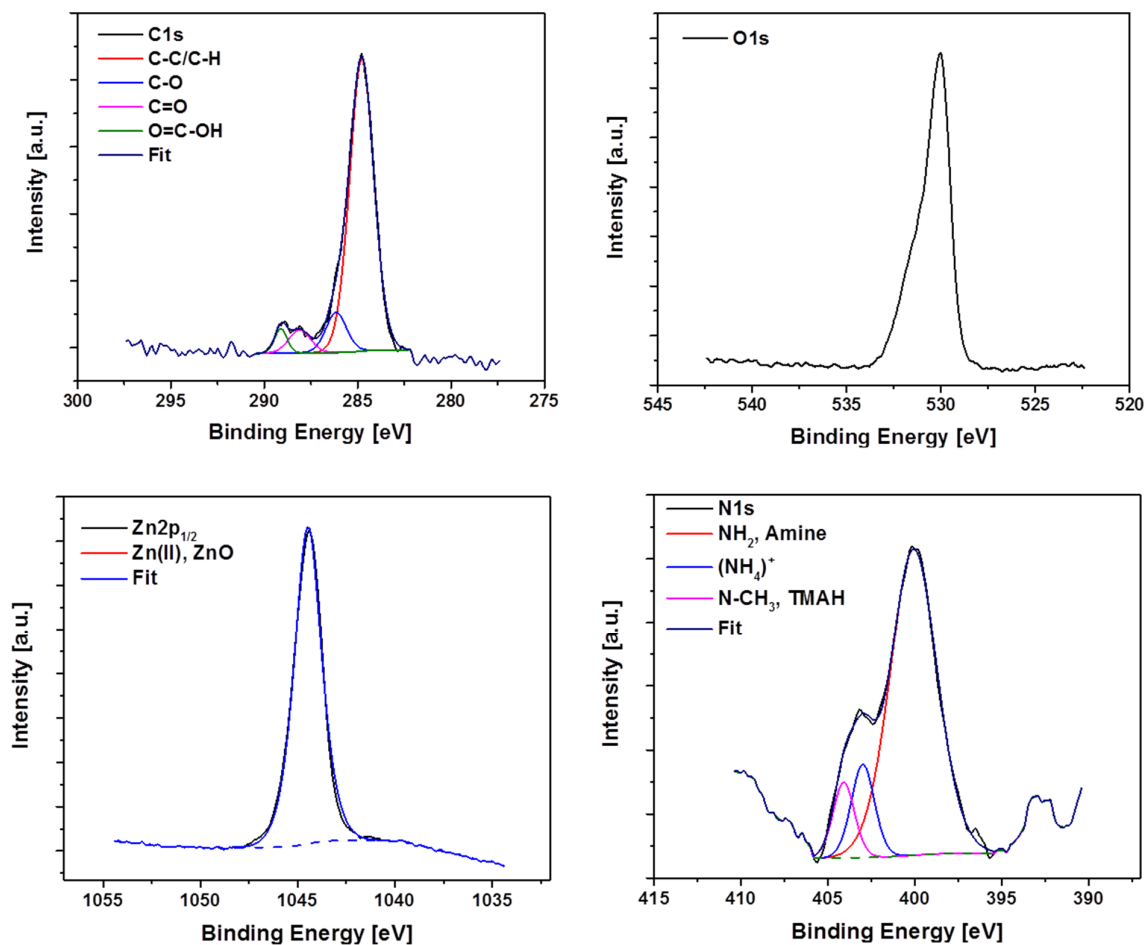

**Figure S3.** High-Resolution XPS spectra for undoped ZnO NPs.

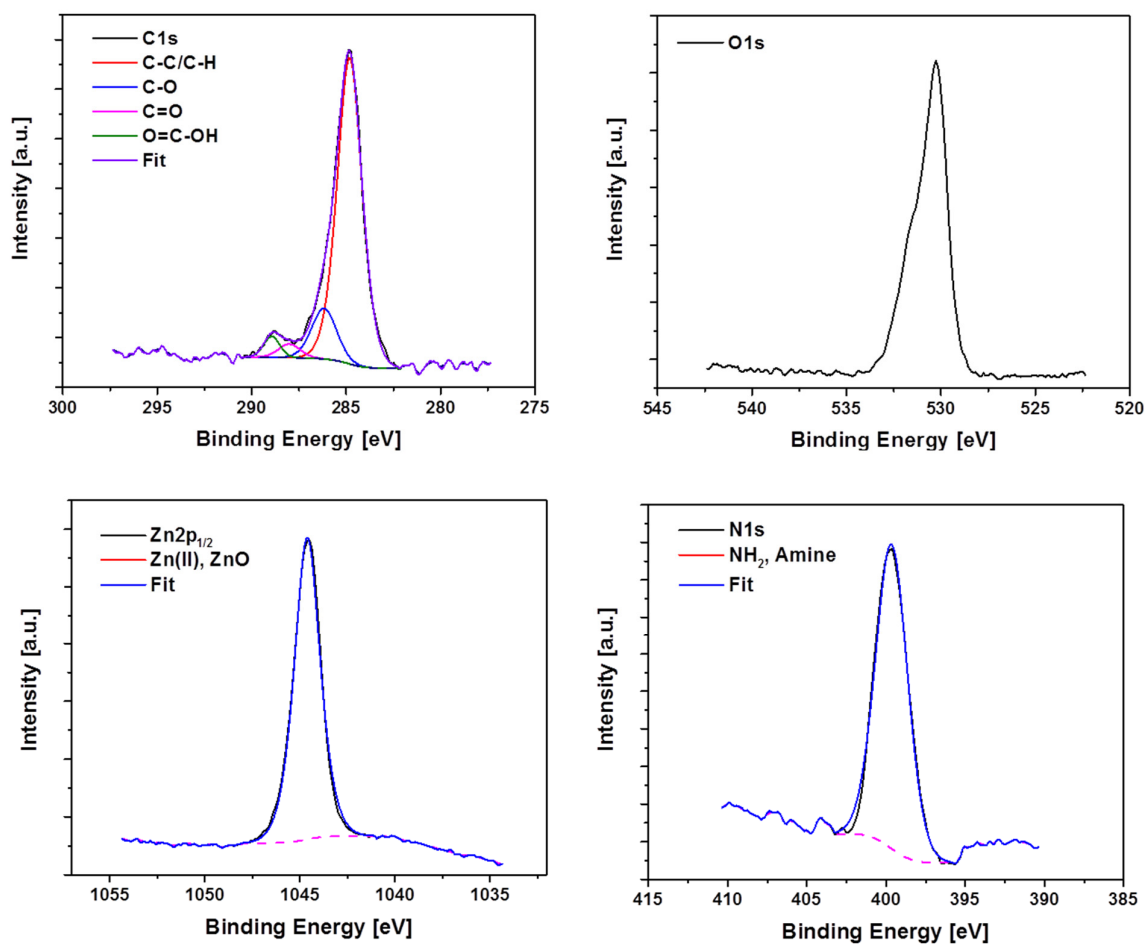

**Figure S4.** High-Resolution XPS spectra for Fe6:ZnO NPs.

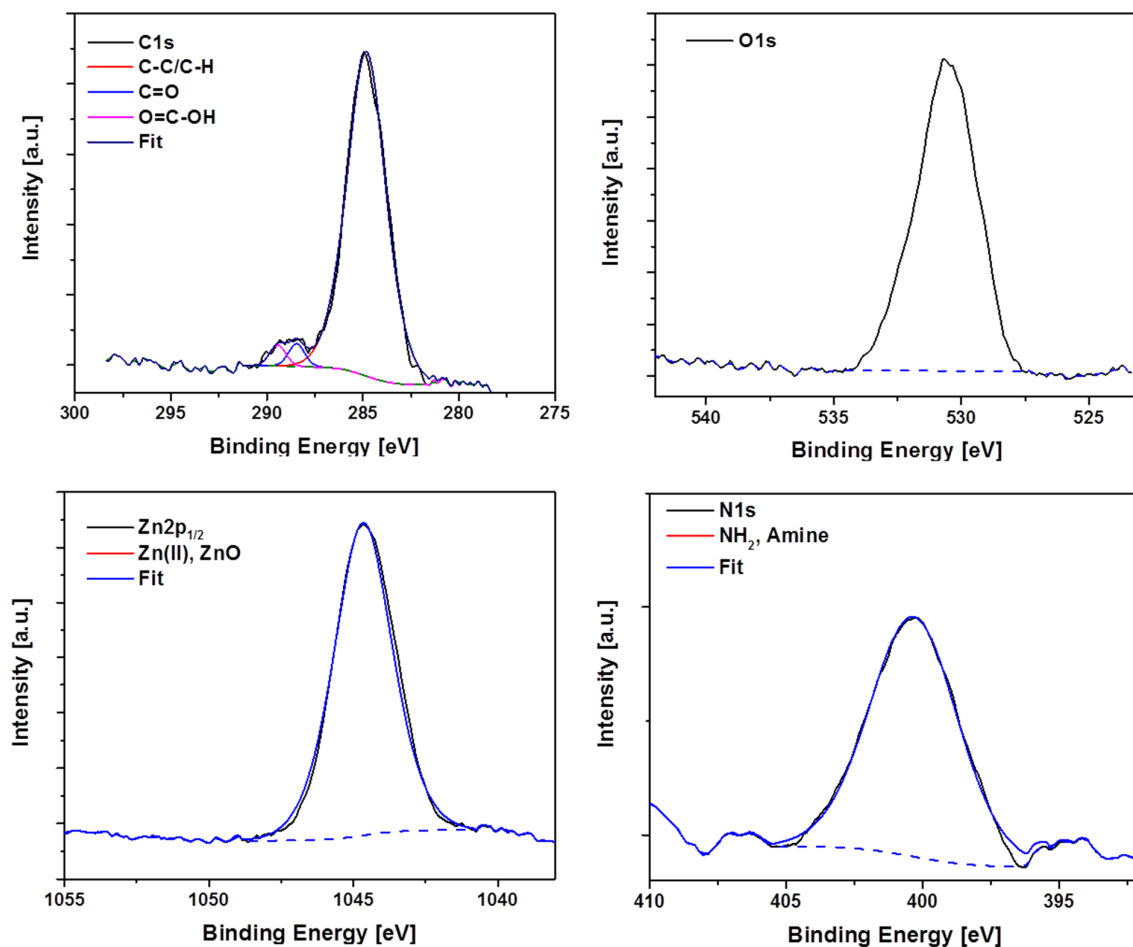

**Figure S5.** High-Resolution XPS spectra for Fe12:ZnO NPs.

**Table S1.** FeO and Fe<sub>2</sub>O<sub>3</sub> peak components (binding energy and % area) obtained by deconvolution of HR Fe2p<sub>3/2</sub> XPS spectrum.

| Sample   | Fe (II), FeO        |             | Fe (III), Fe <sub>2</sub> O <sub>3</sub> |             |
|----------|---------------------|-------------|------------------------------------------|-------------|
|          | Binding Energy [eV] | Area [%]    | Binding Energy, [eV]                     | Area [%]    |
| Fe6:ZnO  | 708.5               | 7.1         | 709.8                                    | 10.6        |
|          | 709.6               | 37.1        | 710.7                                    | 27.4        |
|          |                     |             | 711.6                                    | 14.7        |
|          |                     |             | 712.6                                    | 3.1         |
|          |                     | <b>44.2</b> |                                          | <b>55.8</b> |
| Fe12:ZnO | 708.4               | 19.2        | 709.9                                    | 0.9         |
|          | 709.6               | 43.3        | 710.7                                    | 22.9        |
|          |                     |             | 711.6                                    | 11.6        |
|          |                     |             | 712.7                                    | 2.1         |
|          |                     | <b>62.5</b> |                                          | <b>37.5</b> |

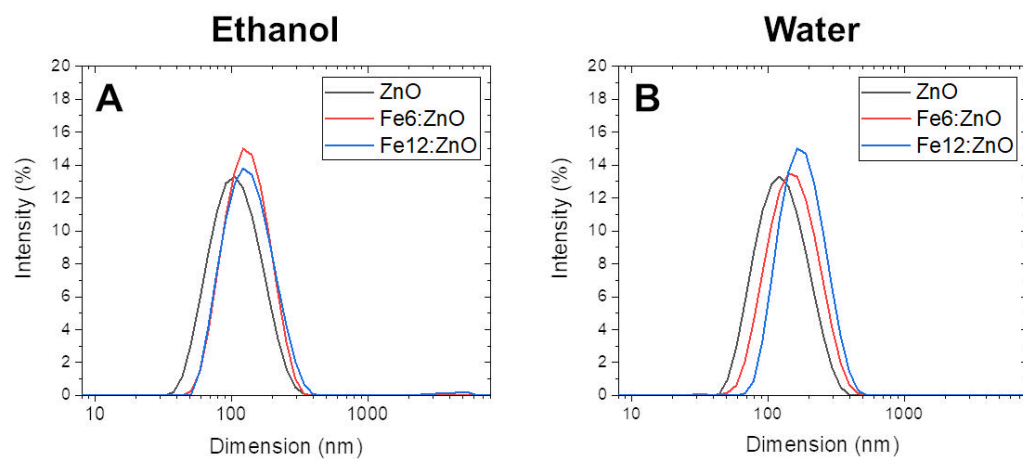

**Figure S6.** Dynamic light scattering results for the NPs. The graphs shows the intensity of the signal expressed in percentage of ZnO and Fe:ZnO NPs in ethanol (A) and water (B).

**Statistical analysis** for ZnO and Fe-ZnO cytotoxicity on B lymphocytes (IST-EBV) and Daudi cell lines. Bonferroni t-test (Three Ways ANOVA)

| Comparison between factor: Nanoparticle |          |            |         |          |         |     |
|-----------------------------------------|----------|------------|---------|----------|---------|-----|
|                                         |          | Mean Diff. | SEM     | t Value  | Prob    | Sig |
| ZnO                                     | Fe6:ZnO  | -4,38333   | 3,82172 | -1,14695 | 0,76529 | 0   |
| ZnO                                     | Fe12:ZnO | -7,95006   | 3,87444 | -2,05193 | 0,13115 | 0   |
| Fe6:ZnO                                 | Fe12:ZnO | -3,56673   | 3,87444 | -0,92058 | 1       | 0   |

| Comparison between parameter: Dose (µg/mL) |    |            |         |          |          |     |
|--------------------------------------------|----|------------|---------|----------|----------|-----|
|                                            |    | Mean Diff. | SEM     | t Value  | Prob     | Sig |
| 0                                          | 10 | 42,77517   | 4,62736 | 9,24397  | 5,77E-13 | 1   |
| 0                                          | 20 | 67,13061   | 4,62736 | 14,50733 | 2,47E-22 | 1   |
| 0                                          | 30 | 80,69233   | 4,62736 | 17,4381  | 6,35E-27 | 1   |
| 0                                          | 40 | 92,11156   | 5,30794 | 17,35353 | 8,48E-27 | 1   |
| 10                                         | 20 | 24,35544   | 4,74757 | 5,13009  | 2,25E-05 | 1   |
| 10                                         | 30 | 37,91716   | 4,74757 | 7,98665  | 1,37E-10 | 1   |
| 10                                         | 40 | 49,33639   | 5,41306 | 9,11432  | 1,01E-12 | 1   |
| 20                                         | 30 | 13,56172   | 4,74757 | 2,85656  | 5,56E-02 | 0   |
| 20                                         | 40 | 24,98095   | 5,41306 | 4,61494  | 1,62E-04 | 1   |
| 30                                         | 40 | 11,41922   | 5,41306 | 2,10957  | 0,38278  | 0   |

| Comparison between parameter: Cell line |       |            |         |         |          |     |
|-----------------------------------------|-------|------------|---------|---------|----------|-----|
|                                         |       | Mean Diff. | SEM     | t Value | Prob     | Sig |
| IST-EBV                                 | Daudi | 33.46824   | 3.14918 | 10.6276 | 1.51E-16 | 1   |

| All pairwise multiple comparisons |              |           |          |              |           |            |         |           |          |     |
|-----------------------------------|--------------|-----------|----------|--------------|-----------|------------|---------|-----------|----------|-----|
| NP                                | Dose (µg/mL) | Cell line | NP       | Dose (µg/mL) | Cell line | Mean Diff. | SEM     | t Value   | Prob     | Sig |
| ZnO                               | 0            | --        | ZnO      | 10           | --        | 42,47643   | 7,80105 | 5,44496   | 6,78E-05 | 1   |
| ZnO                               | 0            | --        | ZnO      | 20           | --        | 73,31089   | 7,80105 | 9,39756   | 3,11E-12 | 1   |
| ZnO                               | 0            | --        | ZnO      | 30           | --        | 89,09258   | 7,80105 | 11,42059  | 5,66E-16 | 1   |
| ZnO                               | 0            | --        | ZnO      | 40           | --        | 98,38542   | 9,5543  | 10,2975   | 6,47E-14 | 1   |
| ZnO                               | 0            | --        | Fe6:ZnO  | 0            | --        | -2,84E-14  | 7,80105 | -3,64E-15 | 1        | 0   |
| ZnO                               | 0            | --        | Fe6:ZnO  | 10           | --        | 46,70689   | 7,80105 | 5,98725   | 7,44E-06 | 1   |
| ZnO                               | 0            | --        | Fe6:ZnO  | 20           | --        | 61,18208   | 7,80105 | 7,8428    | 2,70E-09 | 1   |
| ZnO                               | 0            | --        | Fe6:ZnO  | 30           | --        | 78,83601   | 7,80105 | 10,10582  | 1,47E-13 | 1   |
| ZnO                               | 0            | --        | Fe6:ZnO  | 40           | --        | 94,6237    | 9,5543  | 9,90378   | 3,50E-13 | 1   |
| ZnO                               | 0            | --        | Fe12:ZnO | 0            | --        | -1,56E-13  | 7,80105 | -2,00E-14 | 1        | 0   |
| ZnO                               | 0            | --        | Fe12:ZnO | 10           | --        | 39,1422    | 8,4261  | 4,64535   | 0,00152  | 1   |
| ZnO                               | 0            | --        | Fe12:ZnO | 20           | --        | 66,89887   | 8,4261  | 7,93948   | 1,77E-09 | 1   |
| ZnO                               | 0            | --        | Fe12:ZnO | 30           | --        | 74,14841   | 8,4261  | 8,79985   | 4,17E-11 | 1   |
| ZnO                               | 0            | --        | Fe12:ZnO | 40           | --        | 83,32555   | 8,4261  | 9,88898   | 3,73E-13 | 1   |
| ZnO                               | 10           | --        | ZnO      | 20           | --        | 30,83446   | 7,80105 | 3,9526    | 0,01839  | 1   |
| ZnO                               | 10           | --        | ZnO      | 30           | --        | 46,61616   | 7,80105 | 5,97562   | 7,81E-06 | 1   |

|         |    |    |          |    |    |           |          |          |          |   |
|---------|----|----|----------|----|----|-----------|----------|----------|----------|---|
| ZnO     | 10 | -- | ZnO      | 40 | -- | 55,909    | 9,5543   | 5,85171  | 1,30E-05 | 1 |
| ZnO     | 10 | -- | Fe6:ZnO  | 0  | -- | -42,47643 | 7,80105  | -5,44496 | 6,78E-05 | 1 |
| ZnO     | 10 | -- | Fe6:ZnO  | 10 | -- | 4,23046   | 7,80105  | 0,54229  | 1        | 0 |
| ZnO     | 10 | -- | Fe6:ZnO  | 20 | -- | 18,70565  | 7,80105  | 2,39784  | 1        | 0 |
| ZnO     | 10 | -- | Fe6:ZnO  | 30 | -- | 36,35959  | 7,80105  | 4,66086  | 0,00143  | 1 |
| ZnO     | 10 | -- | Fe6:ZnO  | 40 | -- | 52,14728  | 9,5543   | 5,45799  | 6,44E-05 | 1 |
| ZnO     | 10 | -- | Fe12:ZnO | 0  | -- | -42,47643 | 7,80105  | -5,44496 | 6,78E-05 | 1 |
| ZnO     | 10 | -- | Fe12:ZnO | 10 | -- | -3,33423  | 8,4261   | -0,3957  | 1        | 0 |
| ZnO     | 10 | -- | Fe12:ZnO | 20 | -- | 24,42244  | 8,4261   | 2,89843  | 0,51786  | 0 |
| ZnO     | 10 | -- | Fe12:ZnO | 30 | -- | 31,67198  | 8,4261   | 3,7588   | 0,03554  | 1 |
| ZnO     | 10 | -- | Fe12:ZnO | 40 | -- | 40,84912  | 8,4261   | 4,84793  | 7,04E-04 | 1 |
| ZnO     | 20 | -- | ZnO      | 30 | -- | 15,78169  | 7,80105  | 2,02302  | 1        | 0 |
| ZnO     | 20 | -- | ZnO      | 40 | -- | 25,07453  | 9,5543   | 2,62442  | 1        | 0 |
| ZnO     | 20 | -- | Fe6:ZnO  | 0  | -- | -73,31089 | 7,80105  | -9,39756 | 3,11E-12 | 1 |
| ZnO     | 20 | -- | Fe6:ZnO  | 10 | -- | -26,604   | 7,80105  | -3,41031 | 0,11067  | 0 |
| ZnO     | 20 | -- | Fe6:ZnO  | 20 | -- | -12,12881 | 7,80105  | -1,55477 | 1        | 0 |
| ZnO     | 20 | -- | Fe6:ZnO  | 30 | -- | 5,52512   | 7,80105  | 0,70825  | 1        | 0 |
| ZnO     | 20 | -- | Fe6:ZnO  | 40 | -- | 21,31281  | 9,5543   | 2,2307   | 1        | 0 |
| ZnO     | 20 | -- | Fe12:ZnO | 0  | -- | -73,31089 | 7,80105  | -9,39756 | 3,11E-12 | 1 |
| ZnO     | 20 | -- | Fe12:ZnO | 10 | -- | -34,16869 | 8,4261   | -4,0551  | 0,01288  | 1 |
| ZnO     | 20 | -- | Fe12:ZnO | 20 | -- | -6,41202  | 8,4261   | -0,76097 | 1        | 0 |
| ZnO     | 20 | -- | Fe12:ZnO | 30 | -- | 0,83752   | 8,4261   | 0,0994   | 1        | 0 |
| ZnO     | 20 | -- | Fe12:ZnO | 40 | -- | 10,01466  | 8,4261   | 1,18853  | 1        | 0 |
| ZnO     | 30 | -- | ZnO      | 40 | -- | 9,29284   | 9,5543   | 0,97263  | 1        | 0 |
| ZnO     | 30 | -- | Fe6:ZnO  | 0  | -- | -89,09258 | 7,80105  | -11,4206 | 5,66E-16 | 1 |
| ZnO     | 30 | -- | Fe6:ZnO  | 10 | -- | -42,3857  | 7,80105  | -5,43333 | 7,11E-05 | 1 |
| ZnO     | 30 | -- | Fe6:ZnO  | 20 | -- | -27,9105  | 7,80105  | -3,57779 | 0,06464  | 0 |
| ZnO     | 30 | -- | Fe6:ZnO  | 30 | -- | -10,25657 | 7,80105  | -1,31477 | 1        | 0 |
| ZnO     | 30 | -- | Fe6:ZnO  | 40 | -- | 5,53112   | 9,5543   | 0,57891  | 1        | 0 |
| ZnO     | 30 | -- | Fe12:ZnO | 0  | -- | -89,09258 | 7,80105  | -11,4206 | 5,66E-16 | 1 |
| ZnO     | 30 | -- | Fe12:ZnO | 10 | -- | -49,95038 | 8,4261   | -5,92806 | 9,50E-06 | 1 |
| ZnO     | 30 | -- | Fe12:ZnO | 20 | -- | -22,19371 | 8,4261   | -2,63393 | 1        | 0 |
| ZnO     | 30 | -- | Fe12:ZnO | 30 | -- | -14,94418 | 8,4261   | -1,77356 | 1        | 0 |
| ZnO     | 30 | -- | Fe12:ZnO | 40 | -- | -5,76703  | 8,4261   | -0,68442 | 1        | 0 |
| ZnO     | 40 | -- | Fe6:ZnO  | 0  | -- | -98,38542 | 9,5543   | -10,2975 | 6,47E-14 | 1 |
| ZnO     | 40 | -- | Fe6:ZnO  | 10 | -- | -51,67854 | 9,5543   | -5,40893 | 7,84E-05 | 1 |
| ZnO     | 40 | -- | Fe6:ZnO  | 20 | -- | -37,20334 | 9,5543   | -3,89389 | 0,0225   | 1 |
| ZnO     | 40 | -- | Fe6:ZnO  | 30 | -- | -19,54941 | 9,5543   | -2,04614 | 1        | 0 |
| ZnO     | 40 | -- | Fe6:ZnO  | 40 | -- | -3,76172  | 11,03235 | -0,34097 | 1        | 0 |
| ZnO     | 40 | -- | Fe12:ZnO | 0  | -- | -98,38542 | 9,5543   | -10,2975 | 6,47E-14 | 1 |
| ZnO     | 40 | -- | Fe12:ZnO | 10 | -- | -59,24322 | 10,07111 | -5,88249 | 1,15E-05 | 1 |
| ZnO     | 40 | -- | Fe12:ZnO | 20 | -- | -31,48655 | 10,07111 | -3,12642 | 0,26554  | 0 |
| ZnO     | 40 | -- | Fe12:ZnO | 30 | -- | -24,23701 | 10,07111 | -2,40659 | 1        | 0 |
| ZnO     | 40 | -- | Fe12:ZnO | 40 | -- | -15,05987 | 10,07111 | -1,49535 | 1        | 0 |
| Fe6:ZnO | 0  | -- | Fe6:ZnO  | 10 | -- | 46,70689  | 7,80105  | 5,98725  | 7,44E-06 | 1 |
| Fe6:ZnO | 0  | -- | Fe6:ZnO  | 20 | -- | 61,18208  | 7,80105  | 7,8428   | 2,70E-09 | 1 |

|          |    |         |          |    |         |           |          |           |          |   |
|----------|----|---------|----------|----|---------|-----------|----------|-----------|----------|---|
| Fe6:ZnO  | 0  | --      | Fe6:ZnO  | 30 | --      | 78,83601  | 7,80105  | 10,10582  | 1,47E-13 | 1 |
| Fe6:ZnO  | 0  | --      | Fe6:ZnO  | 40 | --      | 94,6237   | 9,5543   | 9,90378   | 3,50E-13 | 1 |
| Fe6:ZnO  | 0  | --      | Fe12:ZnO | 0  | --      | -1,28E-13 | 7,80105  | -1,64E-14 | 1        | 0 |
| Fe6:ZnO  | 0  | --      | Fe12:ZnO | 10 | --      | 39,1422   | 8,4261   | 4,64535   | 0,00152  | 1 |
| Fe6:ZnO  | 0  | --      | Fe12:ZnO | 20 | --      | 66,89887  | 8,4261   | 7,93948   | 1,77E-09 | 1 |
| Fe6:ZnO  | 0  | --      | Fe12:ZnO | 30 | --      | 74,14841  | 8,4261   | 8,79985   | 4,17E-11 | 1 |
| Fe6:ZnO  | 0  | --      | Fe12:ZnO | 40 | --      | 83,32555  | 8,4261   | 9,88898   | 3,73E-13 | 1 |
| Fe6:ZnO  | 10 | --      | Fe6:ZnO  | 20 | --      | 14,47519  | 7,80105  | 1,85554   | 1        | 0 |
| Fe6:ZnO  | 10 | --      | Fe6:ZnO  | 30 | --      | 32,12913  | 7,80105  | 4,11856   | 0,01031  | 1 |
| Fe6:ZnO  | 10 | --      | Fe6:ZnO  | 40 | --      | 47,91682  | 9,5543   | 5,01521   | 3,70E-04 | 1 |
| Fe6:ZnO  | 10 | --      | Fe12:ZnO | 0  | --      | -46,70689 | 7,80105  | -5,98725  | 7,44E-06 | 1 |
| Fe6:ZnO  | 10 | --      | Fe12:ZnO | 10 | --      | -7,56469  | 8,4261   | -0,89777  | 1        | 0 |
| Fe6:ZnO  | 10 | --      | Fe12:ZnO | 20 | --      | 20,19198  | 8,4261   | 2,39636   | 1        | 0 |
| Fe6:ZnO  | 10 | --      | Fe12:ZnO | 30 | --      | 27,44152  | 8,4261   | 3,25673   | 0,17873  | 0 |
| Fe6:ZnO  | 10 | --      | Fe12:ZnO | 40 | --      | 36,61867  | 8,4261   | 4,34586   | 0,00457  | 1 |
| Fe6:ZnO  | 20 | --      | Fe6:ZnO  | 30 | --      | 17,65394  | 7,80105  | 2,26302   | 1        | 0 |
| Fe6:ZnO  | 20 | --      | Fe6:ZnO  | 40 | --      | 33,44163  | 9,5543   | 3,50017   | 0,0831   | 0 |
| Fe6:ZnO  | 20 | --      | Fe12:ZnO | 0  | --      | -61,18208 | 7,80105  | -7,8428   | 2,70E-09 | 1 |
| Fe6:ZnO  | 20 | --      | Fe12:ZnO | 10 | --      | -22,03988 | 8,4261   | -2,61567  | 1        | 0 |
| Fe6:ZnO  | 20 | --      | Fe12:ZnO | 20 | --      | 5,71679   | 8,4261   | 0,67846   | 1        | 0 |
| Fe6:ZnO  | 20 | --      | Fe12:ZnO | 30 | --      | 12,96633  | 8,4261   | 1,53883   | 1        | 0 |
| Fe6:ZnO  | 20 | --      | Fe12:ZnO | 40 | --      | 22,14347  | 8,4261   | 2,62796   | 1        | 0 |
| Fe6:ZnO  | 30 | --      | Fe6:ZnO  | 40 | --      | 15,78769  | 9,5543   | 1,65242   | 1        | 0 |
| Fe6:ZnO  | 30 | --      | Fe12:ZnO | 0  | --      | -78,83601 | 7,80105  | -10,1058  | 1,47E-13 | 1 |
| Fe6:ZnO  | 30 | --      | Fe12:ZnO | 10 | --      | -39,69381 | 8,4261   | -4,71082  | 0,00118  | 1 |
| Fe6:ZnO  | 30 | --      | Fe12:ZnO | 20 | --      | -11,93715 | 8,4261   | -1,41669  | 1        | 0 |
| Fe6:ZnO  | 30 | --      | Fe12:ZnO | 30 | --      | -4,68761  | 8,4261   | -0,55632  | 1        | 0 |
| Fe6:ZnO  | 30 | --      | Fe12:ZnO | 40 | --      | 4,48954   | 8,4261   | 0,53281   | 1        | 0 |
| Fe6:ZnO  | 40 | --      | Fe12:ZnO | 0  | --      | -94,6237  | 9,5543   | -9,90378  | 3,50E-13 | 1 |
| Fe6:ZnO  | 40 | --      | Fe12:ZnO | 10 | --      | -55,4815  | 10,07111 | -5,50897  | 5,25E-05 | 1 |
| Fe6:ZnO  | 40 | --      | Fe12:ZnO | 20 | --      | -27,72483 | 10,07111 | -2,75291  | 0,77976  | 0 |
| Fe6:ZnO  | 40 | --      | Fe12:ZnO | 30 | --      | -20,4753  | 10,07111 | -2,03307  | 1        | 0 |
| Fe6:ZnO  | 40 | --      | Fe12:ZnO | 40 | --      | -11,29815 | 10,07111 | -1,12184  | 1        | 0 |
| Fe12:ZnO | 0  | --      | Fe12:ZnO | 10 | --      | 39,1422   | 8,4261   | 4,64535   | 0,00152  | 1 |
| Fe12:ZnO | 0  | --      | Fe12:ZnO | 20 | --      | 66,89887  | 8,4261   | 7,93948   | 1,77E-09 | 1 |
| Fe12:ZnO | 0  | --      | Fe12:ZnO | 30 | --      | 74,14841  | 8,4261   | 8,79985   | 4,17E-11 | 1 |
| Fe12:ZnO | 0  | --      | Fe12:ZnO | 40 | --      | 83,32555  | 8,4261   | 9,88898   | 3,73E-13 | 1 |
| Fe12:ZnO | 10 | --      | Fe12:ZnO | 20 | --      | 27,75667  | 9,00788  | 3,08138   | 0,30377  | 0 |
| Fe12:ZnO | 10 | --      | Fe12:ZnO | 30 | --      | 35,00621  | 9,00788  | 3,88618   | 0,0231   | 1 |
| Fe12:ZnO | 10 | --      | Fe12:ZnO | 40 | --      | 44,18335  | 9,00788  | 4,90497   | 5,66E-04 | 1 |
| Fe12:ZnO | 20 | --      | Fe12:ZnO | 30 | --      | 7,24954   | 9,00788  | 0,8048    | 1        | 0 |
| Fe12:ZnO | 20 | --      | Fe12:ZnO | 40 | --      | 16,42668  | 9,00788  | 1,82359   | 1        | 0 |
| Fe12:ZnO | 30 | --      | Fe12:ZnO | 40 | --      | 9,17714   | 9,00788  | 1,01879   | 1        | 0 |
| ZnO      | -- | IST-EBV | ZnO      | -- | Daudi   | 26,91992  | 5,40473  | 4,98081   | 6,03E-05 | 1 |
| ZnO      | -- | IST-EBV | Fe6:ZnO  | -- | IST-EBV | -10,01321 | 5,40473  | -1,85268  | 1        | 0 |
| ZnO      | -- | IST-EBV | Fe6:ZnO  | -- | Daudi   | 28,16647  | 5,40473  | 5,21145   | 2,45E-05 | 1 |



|          |    |         |          |    |         |           |         |          |          |   |
|----------|----|---------|----------|----|---------|-----------|---------|----------|----------|---|
| ZnO      | -- | IST-EBV | Fe12:ZnO | -- | IST-EBV | -12,14266 | 5,47928 | -2,21611 | 0,44638  | 0 |
| ZnO      | -- | IST-EBV | Fe12:ZnO | -- | Daudi   | 23,16246  | 5,47928 | 4,22728  | 0,001    | 1 |
| ZnO      | -- | Daudi   | Fe6:ZnO  | -- | IST-EBV | -36,93312 | 5,40473 | -6,83349 | 3,01E-08 | 1 |
| ZnO      | -- | Daudi   | Fe6:ZnO  | -- | Daudi   | 1,24655   | 5,40473 | 0,23064  | 1        | 0 |
| ZnO      | -- | Daudi   | Fe12:ZnO | -- | IST-EBV | -39,06258 | 5,47928 | -7,12915 | 8,46E-09 | 1 |
| ZnO      | -- | Daudi   | Fe12:ZnO | -- | Daudi   | -3,75746  | 5,47928 | -0,68576 | 1        | 0 |
| Fe6:ZnO  | -- | IST-EBV | Fe6:ZnO  | -- | Daudi   | 38,17968  | 5,40473 | 7,06413  | 1,12E-08 | 1 |
| Fe6:ZnO  | -- | IST-EBV | Fe12:ZnO | -- | IST-EBV | -2,12945  | 5,47928 | -0,38864 | 1        | 0 |
| Fe6:ZnO  | -- | IST-EBV | Fe12:ZnO | -- | Daudi   | 33,17567  | 5,47928 | 6,05475  | 8,03E-07 | 1 |
| Fe6:ZnO  | -- | Daudi   | Fe12:ZnO | -- | IST-EBV | -40,30913 | 5,47928 | -7,35665 | 3,17E-09 | 1 |
| Fe6:ZnO  | -- | Daudi   | Fe12:ZnO | -- | Daudi   | -5,00401  | 5,47928 | -0,91326 | 1        | 0 |
| Fe12:ZnO | -- | IST-EBV | Fe12:ZnO | -- | Daudi   | 35,30512  | 5,55283 | 6,35804  | 2,26E-07 | 1 |
| --       | 0  | IST-EBV | --       | 0  | Daudi   | 5,68E-14  | 6,36953 | 8,92E-15 | 1        | 0 |
| --       | 0  | IST-EBV | --       | 10 | IST-EBV | 18,78562  | 6,54407 | 2,87063  | 0,24024  | 0 |
| --       | 0  | IST-EBV | --       | 10 | Daudi   | 66,76472  | 6,54407 | 10,20232 | 4,17E-14 | 1 |
| --       | 0  | IST-EBV | --       | 20 | IST-EBV | 34,41693  | 6,54407 | 5,25925  | 6,09E-05 | 1 |
| --       | 0  | IST-EBV | --       | 20 | Daudi   | 99,84429  | 6,54407 | 15,25721 | 6,70E-23 | 1 |
| --       | 0  | IST-EBV | --       | 30 | IST-EBV | 61,57196  | 6,54407 | 9,40882  | 1,27E-12 | 1 |
| --       | 0  | IST-EBV | --       | 30 | Daudi   | 99,8127   | 6,54407 | 15,25238 | 6,82E-23 | 1 |
| --       | 0  | IST-EBV | --       | 40 | IST-EBV | 84,26456  | 7,50657 | 11,22545 | 5,48E-16 | 1 |
| --       | 0  | IST-EBV | --       | 40 | Daudi   | 99,95856  | 7,50657 | 13,31615 | 1,11E-19 | 1 |
| --       | 0  | Daudi   | --       | 10 | IST-EBV | 18,78562  | 6,54407 | 2,87063  | 0,24024  | 0 |
| --       | 0  | Daudi   | --       | 10 | Daudi   | 66,76472  | 6,54407 | 10,20232 | 4,17E-14 | 1 |
| --       | 0  | Daudi   | --       | 20 | IST-EBV | 34,41693  | 6,54407 | 5,25925  | 6,09E-05 | 1 |
| --       | 0  | Daudi   | --       | 20 | Daudi   | 99,84429  | 6,54407 | 15,25721 | 6,70E-23 | 1 |
| --       | 0  | Daudi   | --       | 30 | IST-EBV | 61,57196  | 6,54407 | 9,40882  | 1,27E-12 | 1 |
| --       | 0  | Daudi   | --       | 30 | Daudi   | 99,8127   | 6,54407 | 15,25238 | 6,82E-23 | 1 |
| --       | 0  | Daudi   | --       | 40 | IST-EBV | 84,26456  | 7,50657 | 11,22545 | 5,48E-16 | 1 |
| --       | 0  | Daudi   | --       | 40 | Daudi   | 99,95856  | 7,50657 | 13,31615 | 1,11E-19 | 1 |
| --       | 10 | IST-EBV | --       | 10 | Daudi   | 47,97909  | 6,71408 | 7,14605  | 2,36E-08 | 1 |
| --       | 10 | IST-EBV | --       | 20 | IST-EBV | 15,63131  | 6,71408 | 2,32814  | 1        | 0 |
| --       | 10 | IST-EBV | --       | 20 | Daudi   | 81,05867  | 6,71408 | 12,07294 | 1,64E-17 | 1 |
| --       | 10 | IST-EBV | --       | 30 | IST-EBV | 42,78634  | 6,71408 | 6,37263  | 6,38E-07 | 1 |
| --       | 10 | IST-EBV | --       | 30 | Daudi   | 81,02708  | 6,71408 | 12,06824 | 1,67E-17 | 1 |
| --       | 10 | IST-EBV | --       | 40 | IST-EBV | 65,47894  | 7,65522 | 8,5535   | 5,23E-11 | 1 |
| --       | 10 | IST-EBV | --       | 40 | Daudi   | 81,17293  | 7,65522 | 10,6036  | 7,54E-15 | 1 |
| --       | 10 | Daudi   | --       | 20 | IST-EBV | -32,34779 | 6,71408 | -4,81791 | 3,38E-04 | 1 |
| --       | 10 | Daudi   | --       | 20 | Daudi   | 33,07958  | 6,71408 | 4,9269   | 2,23E-04 | 1 |
| --       | 10 | Daudi   | --       | 30 | IST-EBV | -5,19275  | 6,71408 | -0,77341 | 1        | 0 |
| --       | 10 | Daudi   | --       | 30 | Daudi   | 33,04799  | 6,71408 | 4,92219  | 2,27E-04 | 1 |
| --       | 10 | Daudi   | --       | 40 | IST-EBV | 17,49984  | 7,65522 | 2,286    | 1        | 0 |
| --       | 10 | Daudi   | --       | 40 | Daudi   | 33,19384  | 7,65522 | 4,3361   | 0,00203  | 1 |
| --       | 20 | IST-EBV | --       | 20 | Daudi   | 65,42736  | 6,71408 | 9,74481  | 2,97E-13 | 1 |
| --       | 20 | IST-EBV | --       | 30 | IST-EBV | 27,15504  | 6,71408 | 4,04449  | 0,00573  | 1 |
| --       | 20 | IST-EBV | --       | 30 | Daudi   | 65,39577  | 6,71408 | 9,7401   | 3,03E-13 | 1 |
| --       | 20 | IST-EBV | --       | 40 | IST-EBV | 49,84763  | 7,65522 | 6,51158  | 3,55E-07 | 1 |

|     |    |         |          |    |         |           |          |           |          |   |
|-----|----|---------|----------|----|---------|-----------|----------|-----------|----------|---|
| --  | 20 | IST-EBV | --       | 40 | Daudi   | 65,54163  | 7,65522  | 8,56169   | 5,04E-11 | 1 |
| --  | 20 | Daudi   | --       | 30 | IST-EBV | -38,27233 | 6,71408  | -5,70031  | 1,04E-05 | 1 |
| --  | 20 | Daudi   | --       | 30 | Daudi   | -0,03159  | 6,71408  | -0,00471  | 1        | 0 |
| --  | 20 | Daudi   | --       | 40 | IST-EBV | -15,57973 | 7,65522  | -2,03518  | 1        | 0 |
| --  | 20 | Daudi   | --       | 40 | Daudi   | 0,11426   | 7,65522  | 0,01493   | 1        | 0 |
| --  | 30 | IST-EBV | --       | 30 | Daudi   | 38,24074  | 6,71408  | 5,69561   | 1,06E-05 | 1 |
| --  | 30 | IST-EBV | --       | 40 | IST-EBV | 22,6926   | 7,65522  | 2,96433   | 0,18358  | 0 |
| --  | 30 | IST-EBV | --       | 40 | Daudi   | 38,38659  | 7,65522  | 5,01443   | 1,59E-04 | 1 |
| --  | 30 | Daudi   | --       | 40 | IST-EBV | -15,54814 | 7,65522  | -2,03105  | 1        | 0 |
| --  | 30 | Daudi   | --       | 40 | Daudi   | 0,14585   | 7,65522  | 0,01905   | 1        | 0 |
| --  | 40 | IST-EBV | --       | 40 | Daudi   | 15,694    | 8,49271  | 1,84794   | 1        | 0 |
| ZnO | 0  | IST-EBV | ZnO      | 0  | Daudi   | 8,53E-14  | 11,03235 | 7,73E-15  | 1        | 0 |
| ZnO | 0  | IST-EBV | ZnO      | 10 | IST-EBV | 13,92063  | 11,03235 | 1,2618    | 1        | 0 |
| ZnO | 0  | IST-EBV | ZnO      | 10 | Daudi   | 71,03223  | 11,03235 | 6,43854   | 4,67E-06 | 1 |
| ZnO | 0  | IST-EBV | ZnO      | 20 | IST-EBV | 47,0889   | 11,03235 | 4,26826   | 0,02507  | 1 |
| ZnO | 0  | IST-EBV | ZnO      | 20 | Daudi   | 99,53288  | 11,03235 | 9,02191   | 6,58E-11 | 1 |
| ZnO | 0  | IST-EBV | ZnO      | 30 | IST-EBV | 78,18516  | 11,03235 | 7,0869    | 2,94E-07 | 1 |
| ZnO | 0  | IST-EBV | ZnO      | 30 | Daudi   | 100       | 11,03235 | 9,06425   | 5,47E-11 | 1 |
| ZnO | 0  | IST-EBV | ZnO      | 40 | IST-EBV | 96,77084  | 13,51182 | 7,16194   | 2,13E-07 | 1 |
| ZnO | 0  | IST-EBV | ZnO      | 40 | Daudi   | 100       | 13,51182 | 7,40093   | 7,59E-08 | 1 |
| ZnO | 0  | IST-EBV | Fe6:ZnO  | 0  | IST-EBV | -4,26E-14 | 11,03235 | -3,86E-15 | 1        | 0 |
| ZnO | 0  | IST-EBV | Fe6:ZnO  | 0  | Daudi   | 2,84E-14  | 11,03235 | 2,58E-15  | 1        | 0 |
| ZnO | 0  | IST-EBV | Fe6:ZnO  | 10 | IST-EBV | 16,6159   | 11,03235 | 1,50611   | 1        | 0 |
| ZnO | 0  | IST-EBV | Fe6:ZnO  | 10 | Daudi   | 76,79787  | 11,03235 | 6,96115   | 5,05E-07 | 1 |
| ZnO | 0  | IST-EBV | Fe6:ZnO  | 20 | IST-EBV | 22,36416  | 11,03235 | 2,02714   | 1        | 0 |
| ZnO | 0  | IST-EBV | Fe6:ZnO  | 20 | Daudi   | 100       | 11,03235 | 9,06425   | 5,47E-11 | 1 |
| ZnO | 0  | IST-EBV | Fe6:ZnO  | 30 | IST-EBV | 57,67203  | 11,03235 | 5,22754   | 6,67E-04 | 1 |
| ZnO | 0  | IST-EBV | Fe6:ZnO  | 30 | Daudi   | 100       | 11,03235 | 9,06425   | 5,47E-11 | 1 |
| ZnO | 0  | IST-EBV | Fe6:ZnO  | 40 | IST-EBV | 89,24741  | 13,51182 | 6,60514   | 2,31E-06 | 1 |
| ZnO | 0  | IST-EBV | Fe6:ZnO  | 40 | Daudi   | 100       | 13,51182 | 7,40093   | 7,59E-08 | 1 |
| ZnO | 0  | IST-EBV | Fe12:ZnO | 0  | IST-EBV | -9,95E-14 | 11,03235 | -9,02E-15 | 1        | 0 |
| ZnO | 0  | IST-EBV | Fe12:ZnO | 0  | Daudi   | -1,28E-13 | 11,03235 | -1,16E-14 | 1        | 0 |
| ZnO | 0  | IST-EBV | Fe12:ZnO | 10 | IST-EBV | 25,82035  | 11,9163  | 2,16681   | 1        | 0 |
| ZnO | 0  | IST-EBV | Fe12:ZnO | 10 | Daudi   | 52,46405  | 11,9163  | 4,40271   | 0,0154   | 1 |
| ZnO | 0  | IST-EBV | Fe12:ZnO | 20 | IST-EBV | 33,79774  | 11,9163  | 2,83626   | 1        | 0 |
| ZnO | 0  | IST-EBV | Fe12:ZnO | 20 | Daudi   | 100       | 11,9163  | 8,39186   | 1,02E-09 | 1 |
| ZnO | 0  | IST-EBV | Fe12:ZnO | 30 | IST-EBV | 48,8587   | 11,9163  | 4,10016   | 0,04557  | 1 |
| ZnO | 0  | IST-EBV | Fe12:ZnO | 30 | Daudi   | 99,43811  | 11,9163  | 8,34471   | 1,26E-09 | 1 |
| ZnO | 0  | IST-EBV | Fe12:ZnO | 40 | IST-EBV | 66,77543  | 11,9163  | 5,6037    | 1,48E-04 | 1 |
| ZnO | 0  | IST-EBV | Fe12:ZnO | 40 | Daudi   | 99,87567  | 11,9163  | 8,38143   | 1,07E-09 | 1 |
| ZnO | 0  | Daudi   | ZnO      | 10 | IST-EBV | 13,92063  | 11,03235 | 1,2618    | 1        | 0 |
| ZnO | 0  | Daudi   | ZnO      | 10 | Daudi   | 71,03223  | 11,03235 | 6,43854   | 4,67E-06 | 1 |
| ZnO | 0  | Daudi   | ZnO      | 20 | IST-EBV | 47,0889   | 11,03235 | 4,26826   | 0,02507  | 1 |
| ZnO | 0  | Daudi   | ZnO      | 20 | Daudi   | 99,53288  | 11,03235 | 9,02191   | 6,58E-11 | 1 |
| ZnO | 0  | Daudi   | ZnO      | 30 | IST-EBV | 78,18516  | 11,03235 | 7,0869    | 2,94E-07 | 1 |
| ZnO | 0  | Daudi   | ZnO      | 30 | Daudi   | 100       | 11,03235 | 9,06425   | 5,47E-11 | 1 |

|     |    |         |          |    |         |           |          |           |          |   |
|-----|----|---------|----------|----|---------|-----------|----------|-----------|----------|---|
| ZnO | 0  | Daudi   | ZnO      | 40 | IST-EBV | 96,77084  | 13,51182 | 7,16194   | 2,13E-07 | 1 |
| ZnO | 0  | Daudi   | ZnO      | 40 | Daudi   | 100       | 13,51182 | 7,40093   | 7,59E-08 | 1 |
| ZnO | 0  | Daudi   | Fe6:ZnO  | 0  | IST-EBV | -1,28E-13 | 11,03235 | -1,16E-14 | 1        | 0 |
| ZnO | 0  | Daudi   | Fe6:ZnO  | 0  | Daudi   | -5,68E-14 | 11,03235 | -5,15E-15 | 1        | 0 |
| ZnO | 0  | Daudi   | Fe6:ZnO  | 10 | IST-EBV | 16,6159   | 11,03235 | 1,50611   | 1        | 0 |
| ZnO | 0  | Daudi   | Fe6:ZnO  | 10 | Daudi   | 76,79787  | 11,03235 | 6,96115   | 5,05E-07 | 1 |
| ZnO | 0  | Daudi   | Fe6:ZnO  | 20 | IST-EBV | 22,36416  | 11,03235 | 2,02714   | 1        | 0 |
| ZnO | 0  | Daudi   | Fe6:ZnO  | 20 | Daudi   | 100       | 11,03235 | 9,06425   | 5,47E-11 | 1 |
| ZnO | 0  | Daudi   | Fe6:ZnO  | 30 | IST-EBV | 57,67203  | 11,03235 | 5,22754   | 6,67E-04 | 1 |
| ZnO | 0  | Daudi   | Fe6:ZnO  | 30 | Daudi   | 100       | 11,03235 | 9,06425   | 5,47E-11 | 1 |
| ZnO | 0  | Daudi   | Fe6:ZnO  | 40 | IST-EBV | 89,24741  | 13,51182 | 6,60514   | 2,31E-06 | 1 |
| ZnO | 0  | Daudi   | Fe6:ZnO  | 40 | Daudi   | 100       | 13,51182 | 7,40093   | 7,59E-08 | 1 |
| ZnO | 0  | Daudi   | Fe12:ZnO | 0  | IST-EBV | -1,85E-13 | 11,03235 | -1,67E-14 | 1        | 0 |
| ZnO | 0  | Daudi   | Fe12:ZnO | 0  | Daudi   | -2,13E-13 | 11,03235 | -1,93E-14 | 1        | 0 |
| ZnO | 0  | Daudi   | Fe12:ZnO | 10 | IST-EBV | 25,82035  | 11,9163  | 2,16681   | 1        | 0 |
| ZnO | 0  | Daudi   | Fe12:ZnO | 10 | Daudi   | 52,46405  | 11,9163  | 4,40271   | 0,0154   | 1 |
| ZnO | 0  | Daudi   | Fe12:ZnO | 20 | IST-EBV | 33,79774  | 11,9163  | 2,83626   | 1        | 0 |
| ZnO | 0  | Daudi   | Fe12:ZnO | 20 | Daudi   | 100       | 11,9163  | 8,39186   | 1,02E-09 | 1 |
| ZnO | 0  | Daudi   | Fe12:ZnO | 30 | IST-EBV | 48,8587   | 11,9163  | 4,10016   | 0,04557  | 1 |
| ZnO | 0  | Daudi   | Fe12:ZnO | 30 | Daudi   | 99,43811  | 11,9163  | 8,34471   | 1,26E-09 | 1 |
| ZnO | 0  | Daudi   | Fe12:ZnO | 40 | IST-EBV | 66,77543  | 11,9163  | 5,6037    | 1,48E-04 | 1 |
| ZnO | 0  | Daudi   | Fe12:ZnO | 40 | Daudi   | 99,87567  | 11,9163  | 8,38143   | 1,07E-09 | 1 |
| ZnO | 10 | IST-EBV | ZnO      | 10 | Daudi   | 57,1116   | 11,03235 | 5,17674   | 8,15E-04 | 1 |
| ZnO | 10 | IST-EBV | ZnO      | 20 | IST-EBV | 33,16827  | 11,03235 | 3,00645   | 1        | 0 |
| ZnO | 10 | IST-EBV | ZnO      | 20 | Daudi   | 85,61226  | 11,03235 | 7,76011   | 1,60E-08 | 1 |
| ZnO | 10 | IST-EBV | ZnO      | 30 | IST-EBV | 64,26454  | 11,03235 | 5,8251    | 6,01E-05 | 1 |
| ZnO | 10 | IST-EBV | ZnO      | 30 | Daudi   | 86,07937  | 11,03235 | 7,80245   | 1,33E-08 | 1 |
| ZnO | 10 | IST-EBV | ZnO      | 40 | IST-EBV | 82,85022  | 13,51182 | 6,13169   | 1,69E-05 | 1 |
| ZnO | 10 | IST-EBV | ZnO      | 40 | Daudi   | 86,07937  | 13,51182 | 6,37067   | 6,22E-06 | 1 |
| ZnO | 10 | IST-EBV | Fe6:ZnO  | 0  | IST-EBV | -13,92063 | 11,03235 | -1,2618   | 1        | 0 |
| ZnO | 10 | IST-EBV | Fe6:ZnO  | 0  | Daudi   | -13,92063 | 11,03235 | -1,2618   | 1        | 0 |
| ZnO | 10 | IST-EBV | Fe6:ZnO  | 10 | IST-EBV | 2,69528   | 11,03235 | 0,24431   | 1        | 0 |
| ZnO | 10 | IST-EBV | Fe6:ZnO  | 10 | Daudi   | 62,87724  | 11,03235 | 5,69935   | 1,01E-04 | 1 |
| ZnO | 10 | IST-EBV | Fe6:ZnO  | 20 | IST-EBV | 8,44353   | 11,03235 | 0,76534   | 1        | 0 |
| ZnO | 10 | IST-EBV | Fe6:ZnO  | 20 | Daudi   | 86,07937  | 11,03235 | 7,80245   | 1,33E-08 | 1 |
| ZnO | 10 | IST-EBV | Fe6:ZnO  | 30 | IST-EBV | 43,7514   | 11,03235 | 3,96574   | 0,07281  | 0 |
| ZnO | 10 | IST-EBV | Fe6:ZnO  | 30 | Daudi   | 86,07937  | 11,03235 | 7,80245   | 1,33E-08 | 1 |
| ZnO | 10 | IST-EBV | Fe6:ZnO  | 40 | IST-EBV | 75,32678  | 13,51182 | 5,57488   | 1,67E-04 | 1 |
| ZnO | 10 | IST-EBV | Fe6:ZnO  | 40 | Daudi   | 86,07937  | 13,51182 | 6,37067   | 6,22E-06 | 1 |
| ZnO | 10 | IST-EBV | Fe12:ZnO | 0  | IST-EBV | -13,92063 | 11,03235 | -1,2618   | 1        | 0 |
| ZnO | 10 | IST-EBV | Fe12:ZnO | 0  | Daudi   | -13,92063 | 11,03235 | -1,2618   | 1        | 0 |
| ZnO | 10 | IST-EBV | Fe12:ZnO | 10 | IST-EBV | 11,89972  | 11,9163  | 0,99861   | 1        | 0 |
| ZnO | 10 | IST-EBV | Fe12:ZnO | 10 | Daudi   | 38,54343  | 11,9163  | 3,23451   | 0,79271  | 0 |
| ZnO | 10 | IST-EBV | Fe12:ZnO | 20 | IST-EBV | 19,87711  | 11,9163  | 1,66806   | 1        | 0 |
| ZnO | 10 | IST-EBV | Fe12:ZnO | 20 | Daudi   | 86,07937  | 11,9163  | 7,22366   | 1,63E-07 | 1 |
| ZnO | 10 | IST-EBV | Fe12:ZnO | 30 | IST-EBV | 34,93808  | 11,9163  | 2,93196   | 1        | 0 |

|     |    |         |          |    |         |           |          |          |          |   |
|-----|----|---------|----------|----|---------|-----------|----------|----------|----------|---|
| ZnO | 10 | IST-EBV | Fe12:ZnO | 30 | Daudi   | 85,51748  | 11,9163  | 7,17651  | 2,00E-07 | 1 |
| ZnO | 10 | IST-EBV | Fe12:ZnO | 40 | IST-EBV | 52,85481  | 11,9163  | 4,4355   | 0,01366  | 1 |
| ZnO | 10 | IST-EBV | Fe12:ZnO | 40 | Daudi   | 85,95504  | 11,9163  | 7,21323  | 1,71E-07 | 1 |
| ZnO | 10 | Daudi   | ZnO      | 20 | IST-EBV | -23,94333 | 11,03235 | -2,17028 | 1        | 0 |
| ZnO | 10 | Daudi   | ZnO      | 20 | Daudi   | 28,50066  | 11,03235 | 2,58337  | 1        | 0 |
| ZnO | 10 | Daudi   | ZnO      | 30 | IST-EBV | 7,15294   | 11,03235 | 0,64836  | 1        | 0 |
| ZnO | 10 | Daudi   | ZnO      | 30 | Daudi   | 28,96777  | 11,03235 | 2,62571  | 1        | 0 |
| ZnO | 10 | Daudi   | ZnO      | 40 | IST-EBV | 25,73862  | 13,51182 | 1,9049   | 1        | 0 |
| ZnO | 10 | Daudi   | ZnO      | 40 | Daudi   | 28,96777  | 13,51182 | 2,14388  | 1        | 0 |
| ZnO | 10 | Daudi   | Fe6:ZnO  | 0  | IST-EBV | -71,03223 | 11,03235 | -6,43854 | 4,67E-06 | 1 |
| ZnO | 10 | Daudi   | Fe6:ZnO  | 0  | Daudi   | -71,03223 | 11,03235 | -6,43854 | 4,67E-06 | 1 |
| ZnO | 10 | Daudi   | Fe6:ZnO  | 10 | IST-EBV | -54,41632 | 11,03235 | -4,93243 | 0,00211  | 1 |
| ZnO | 10 | Daudi   | Fe6:ZnO  | 10 | Daudi   | 5,76564   | 11,03235 | 0,52261  | 1        | 0 |
| ZnO | 10 | Daudi   | Fe6:ZnO  | 20 | IST-EBV | -48,66807 | 11,03235 | -4,4114  | 0,01492  | 1 |
| ZnO | 10 | Daudi   | Fe6:ZnO  | 20 | Daudi   | 28,96777  | 11,03235 | 2,62571  | 1        | 0 |
| ZnO | 10 | Daudi   | Fe6:ZnO  | 30 | IST-EBV | -13,3602  | 11,03235 | -1,211   | 1        | 0 |
| ZnO | 10 | Daudi   | Fe6:ZnO  | 30 | Daudi   | 28,96777  | 11,03235 | 2,62571  | 1        | 0 |
| ZnO | 10 | Daudi   | Fe6:ZnO  | 40 | IST-EBV | 18,21518  | 13,51182 | 1,34809  | 1        | 0 |
| ZnO | 10 | Daudi   | Fe6:ZnO  | 40 | Daudi   | 28,96777  | 13,51182 | 2,14388  | 1        | 0 |
| ZnO | 10 | Daudi   | Fe12:ZnO | 0  | IST-EBV | -71,03223 | 11,03235 | -6,43854 | 4,67E-06 | 1 |
| ZnO | 10 | Daudi   | Fe12:ZnO | 0  | Daudi   | -71,03223 | 11,03235 | -6,43854 | 4,67E-06 | 1 |
| ZnO | 10 | Daudi   | Fe12:ZnO | 10 | IST-EBV | -45,21188 | 11,9163  | -3,79412 | 0,13077  | 0 |
| ZnO | 10 | Daudi   | Fe12:ZnO | 10 | Daudi   | -18,56817 | 11,9163  | -1,55822 | 1        | 0 |
| ZnO | 10 | Daudi   | Fe12:ZnO | 20 | IST-EBV | -37,23449 | 11,9163  | -3,12467 | 1        | 0 |
| ZnO | 10 | Daudi   | Fe12:ZnO | 20 | Daudi   | 28,96777  | 11,9163  | 2,43094  | 1        | 0 |
| ZnO | 10 | Daudi   | Fe12:ZnO | 30 | IST-EBV | -22,17352 | 11,9163  | -1,86077 | 1        | 0 |
| ZnO | 10 | Daudi   | Fe12:ZnO | 30 | Daudi   | 28,40588  | 11,9163  | 2,38378  | 1        | 0 |
| ZnO | 10 | Daudi   | Fe12:ZnO | 40 | IST-EBV | -4,25679  | 11,9163  | -0,35722 | 1        | 0 |
| ZnO | 10 | Daudi   | Fe12:ZnO | 40 | Daudi   | 28,84344  | 11,9163  | 2,4205   | 1        | 0 |
| ZnO | 20 | IST-EBV | ZnO      | 20 | Daudi   | 52,44399  | 11,03235 | 4,75365  | 0,00417  | 1 |
| ZnO | 20 | IST-EBV | ZnO      | 30 | IST-EBV | 31,09627  | 11,03235 | 2,81864  | 1        | 0 |
| ZnO | 20 | IST-EBV | ZnO      | 30 | Daudi   | 52,9111   | 11,03235 | 4,79599  | 0,00355  | 1 |
| ZnO | 20 | IST-EBV | ZnO      | 40 | IST-EBV | 49,68194  | 13,51182 | 3,67693  | 0,1934   | 0 |
| ZnO | 20 | IST-EBV | ZnO      | 40 | Daudi   | 52,9111   | 13,51182 | 3,91591  | 0,08643  | 0 |
| ZnO | 20 | IST-EBV | Fe6:ZnO  | 0  | IST-EBV | -47,0889  | 11,03235 | -4,26826 | 0,02507  | 1 |
| ZnO | 20 | IST-EBV | Fe6:ZnO  | 0  | Daudi   | -47,0889  | 11,03235 | -4,26826 | 0,02507  | 1 |
| ZnO | 20 | IST-EBV | Fe6:ZnO  | 10 | IST-EBV | -30,47299 | 11,03235 | -2,76215 | 1        | 0 |
| ZnO | 20 | IST-EBV | Fe6:ZnO  | 10 | Daudi   | 29,70897  | 11,03235 | 2,6929   | 1        | 0 |
| ZnO | 20 | IST-EBV | Fe6:ZnO  | 20 | IST-EBV | -24,72474 | 11,03235 | -2,24111 | 1        | 0 |
| ZnO | 20 | IST-EBV | Fe6:ZnO  | 20 | Daudi   | 52,9111   | 11,03235 | 4,79599  | 0,00355  | 1 |
| ZnO | 20 | IST-EBV | Fe6:ZnO  | 30 | IST-EBV | 10,58313  | 11,03235 | 0,95928  | 1        | 0 |
| ZnO | 20 | IST-EBV | Fe6:ZnO  | 30 | Daudi   | 52,9111   | 11,03235 | 4,79599  | 0,00355  | 1 |
| ZnO | 20 | IST-EBV | Fe6:ZnO  | 40 | IST-EBV | 42,15851  | 13,51182 | 3,12012  | 1        | 0 |
| ZnO | 20 | IST-EBV | Fe6:ZnO  | 40 | Daudi   | 52,9111   | 13,51182 | 3,91591  | 0,08643  | 0 |
| ZnO | 20 | IST-EBV | Fe12:ZnO | 0  | IST-EBV | -47,0889  | 11,03235 | -4,26826 | 0,02507  | 1 |
| ZnO | 20 | IST-EBV | Fe12:ZnO | 0  | Daudi   | -47,0889  | 11,03235 | -4,26826 | 0,02507  | 1 |

|     |    |         |          |    |         |           |          |          |          |   |
|-----|----|---------|----------|----|---------|-----------|----------|----------|----------|---|
| ZnO | 20 | IST-EBV | Fe12:ZnO | 10 | IST-EBV | -21,26855 | 11,9163  | -1,78483 | 1        | 0 |
| ZnO | 20 | IST-EBV | Fe12:ZnO | 10 | Daudi   | 5,37516   | 11,9163  | 0,45108  | 1        | 0 |
| ZnO | 20 | IST-EBV | Fe12:ZnO | 20 | IST-EBV | -13,29116 | 11,9163  | -1,11538 | 1        | 0 |
| ZnO | 20 | IST-EBV | Fe12:ZnO | 20 | Daudi   | 52,9111   | 11,9163  | 4,44023  | 0,01343  | 1 |
| ZnO | 20 | IST-EBV | Fe12:ZnO | 30 | IST-EBV | 1,76981   | 11,9163  | 0,14852  | 1        | 0 |
| ZnO | 20 | IST-EBV | Fe12:ZnO | 30 | Daudi   | 52,34921  | 11,9163  | 4,39307  | 0,01596  | 1 |
| ZnO | 20 | IST-EBV | Fe12:ZnO | 40 | IST-EBV | 19,68654  | 11,9163  | 1,65207  | 1        | 0 |
| ZnO | 20 | IST-EBV | Fe12:ZnO | 40 | Daudi   | 52,78677  | 11,9163  | 4,42979  | 0,01395  | 1 |
| ZnO | 20 | Daudi   | ZnO      | 30 | IST-EBV | -21,34772 | 11,03235 | -1,93501 | 1        | 0 |
| ZnO | 20 | Daudi   | ZnO      | 30 | Daudi   | 0,46712   | 11,03235 | 0,04234  | 1        | 0 |
| ZnO | 20 | Daudi   | ZnO      | 40 | IST-EBV | -2,76204  | 13,51182 | -0,20442 | 1        | 0 |
| ZnO | 20 | Daudi   | ZnO      | 40 | Daudi   | 0,46712   | 13,51182 | 0,03457  | 1        | 0 |
| ZnO | 20 | Daudi   | Fe6:ZnO  | 0  | IST-EBV | -99,53288 | 11,03235 | -9,02191 | 6,58E-11 | 1 |
| ZnO | 20 | Daudi   | Fe6:ZnO  | 0  | Daudi   | -99,53288 | 11,03235 | -9,02191 | 6,58E-11 | 1 |
| ZnO | 20 | Daudi   | Fe6:ZnO  | 10 | IST-EBV | -82,91698 | 11,03235 | -7,5158  | 4,62E-08 | 1 |
| ZnO | 20 | Daudi   | Fe6:ZnO  | 10 | Daudi   | -22,73501 | 11,03235 | -2,06076 | 1        | 0 |
| ZnO | 20 | Daudi   | Fe6:ZnO  | 20 | IST-EBV | -77,16873 | 11,03235 | -6,99477 | 4,37E-07 | 1 |
| ZnO | 20 | Daudi   | Fe6:ZnO  | 20 | Daudi   | 0,46712   | 11,03235 | 0,04234  | 1        | 0 |
| ZnO | 20 | Daudi   | Fe6:ZnO  | 30 | IST-EBV | -41,86085 | 11,03235 | -3,79437 | 0,13066  | 0 |
| ZnO | 20 | Daudi   | Fe6:ZnO  | 30 | Daudi   | 0,46712   | 11,03235 | 0,04234  | 1        | 0 |
| ZnO | 20 | Daudi   | Fe6:ZnO  | 40 | IST-EBV | -10,28548 | 13,51182 | -0,76122 | 1        | 0 |
| ZnO | 20 | Daudi   | Fe6:ZnO  | 40 | Daudi   | 0,46712   | 13,51182 | 0,03457  | 1        | 0 |
| ZnO | 20 | Daudi   | Fe12:ZnO | 0  | IST-EBV | -99,53288 | 11,03235 | -9,02191 | 6,58E-11 | 1 |
| ZnO | 20 | Daudi   | Fe12:ZnO | 0  | Daudi   | -99,53288 | 11,03235 | -9,02191 | 6,58E-11 | 1 |
| ZnO | 20 | Daudi   | Fe12:ZnO | 10 | IST-EBV | -73,71254 | 11,9163  | -6,18586 | 1,35E-05 | 1 |
| ZnO | 20 | Daudi   | Fe12:ZnO | 10 | Daudi   | -47,06883 | 11,9163  | -3,94995 | 0,07689  | 0 |
| ZnO | 20 | Daudi   | Fe12:ZnO | 20 | IST-EBV | -65,73515 | 11,9163  | -5,5164  | 2,11E-04 | 1 |
| ZnO | 20 | Daudi   | Fe12:ZnO | 20 | Daudi   | 0,46712   | 11,9163  | 0,0392   | 1        | 0 |
| ZnO | 20 | Daudi   | Fe12:ZnO | 30 | IST-EBV | -50,67418 | 11,9163  | -4,25251 | 0,02653  | 1 |
| ZnO | 20 | Daudi   | Fe12:ZnO | 30 | Daudi   | -0,09477  | 11,9163  | -0,00795 | 1        | 0 |
| ZnO | 20 | Daudi   | Fe12:ZnO | 40 | IST-EBV | -32,75745 | 11,9163  | -2,74896 | 1        | 0 |
| ZnO | 20 | Daudi   | Fe12:ZnO | 40 | Daudi   | 0,34279   | 11,9163  | 0,02877  | 1        | 0 |
| ZnO | 30 | IST-EBV | ZnO      | 30 | Daudi   | 21,81484  | 11,03235 | 1,97735  | 1        | 0 |
| ZnO | 30 | IST-EBV | ZnO      | 40 | IST-EBV | 18,58568  | 13,51182 | 1,37551  | 1        | 0 |
| ZnO | 30 | IST-EBV | ZnO      | 40 | Daudi   | 21,81484  | 13,51182 | 1,6145   | 1        | 0 |
| ZnO | 30 | IST-EBV | Fe6:ZnO  | 0  | IST-EBV | -78,18516 | 11,03235 | -7,0869  | 2,94E-07 | 1 |
| ZnO | 30 | IST-EBV | Fe6:ZnO  | 0  | Daudi   | -78,18516 | 11,03235 | -7,0869  | 2,94E-07 | 1 |
| ZnO | 30 | IST-EBV | Fe6:ZnO  | 10 | IST-EBV | -61,56926 | 11,03235 | -5,58079 | 1,63E-04 | 1 |
| ZnO | 30 | IST-EBV | Fe6:ZnO  | 10 | Daudi   | -1,3873   | 11,03235 | -0,12575 | 1        | 0 |
| ZnO | 30 | IST-EBV | Fe6:ZnO  | 20 | IST-EBV | -55,82101 | 11,03235 | -5,05976 | 0,00129  | 1 |
| ZnO | 30 | IST-EBV | Fe6:ZnO  | 20 | Daudi   | 21,81484  | 11,03235 | 1,97735  | 1        | 0 |
| ZnO | 30 | IST-EBV | Fe6:ZnO  | 30 | IST-EBV | -20,51314 | 11,03235 | -1,85936 | 1        | 0 |
| ZnO | 30 | IST-EBV | Fe6:ZnO  | 30 | Daudi   | 21,81484  | 11,03235 | 1,97735  | 1        | 0 |
| ZnO | 30 | IST-EBV | Fe6:ZnO  | 40 | IST-EBV | 11,06224  | 13,51182 | 0,81871  | 1        | 0 |
| ZnO | 30 | IST-EBV | Fe6:ZnO  | 40 | Daudi   | 21,81484  | 13,51182 | 1,6145   | 1        | 0 |
| ZnO | 30 | IST-EBV | Fe12:ZnO | 0  | IST-EBV | -78,18516 | 11,03235 | -7,0869  | 2,94E-07 | 1 |

|     |    |         |          |    |         |           |          |           |          |   |
|-----|----|---------|----------|----|---------|-----------|----------|-----------|----------|---|
| ZnO | 30 | IST-EBV | Fe12:ZnO | 0  | Daudi   | -78,18516 | 11,03235 | -7,0869   | 2,94E-07 | 1 |
| ZnO | 30 | IST-EBV | Fe12:ZnO | 10 | IST-EBV | -52,36482 | 11,9163  | -4,39438  | 0,01588  | 1 |
| ZnO | 30 | IST-EBV | Fe12:ZnO | 10 | Daudi   | -25,72111 | 11,9163  | -2,15848  | 1        | 0 |
| ZnO | 30 | IST-EBV | Fe12:ZnO | 20 | IST-EBV | -44,38743 | 11,9163  | -3,72493  | 0,1649   | 0 |
| ZnO | 30 | IST-EBV | Fe12:ZnO | 20 | Daudi   | 21,81484  | 11,9163  | 1,83067   | 1        | 0 |
| ZnO | 30 | IST-EBV | Fe12:ZnO | 30 | IST-EBV | -29,32646 | 11,9163  | -2,46104  | 1        | 0 |
| ZnO | 30 | IST-EBV | Fe12:ZnO | 30 | Daudi   | 21,25295  | 11,9163  | 1,78352   | 1        | 0 |
| ZnO | 30 | IST-EBV | Fe12:ZnO | 40 | IST-EBV | -11,40973 | 11,9163  | -0,95749  | 1        | 0 |
| ZnO | 30 | IST-EBV | Fe12:ZnO | 40 | Daudi   | 21,6905   | 11,9163  | 1,82024   | 1        | 0 |
| ZnO | 30 | Daudi   | ZnO      | 40 | IST-EBV | -3,22916  | 13,51182 | -0,23899  | 1        | 0 |
| ZnO | 30 | Daudi   | ZnO      | 40 | Daudi   | -3,84E-13 | 13,51182 | -2,84E-14 | 1        | 0 |
| ZnO | 30 | Daudi   | Fe6:ZnO  | 0  | IST-EBV | -100      | 11,03235 | -9,06425  | 5,47E-11 | 1 |
| ZnO | 30 | Daudi   | Fe6:ZnO  | 0  | Daudi   | -100      | 11,03235 | -9,06425  | 5,47E-11 | 1 |
| ZnO | 30 | Daudi   | Fe6:ZnO  | 10 | IST-EBV | -83,3841  | 11,03235 | -7,55814  | 3,84E-08 | 1 |
| ZnO | 30 | Daudi   | Fe6:ZnO  | 10 | Daudi   | -23,20213 | 11,03235 | -2,1031   | 1        | 0 |
| ZnO | 30 | Daudi   | Fe6:ZnO  | 20 | IST-EBV | -77,63584 | 11,03235 | -7,03711  | 3,65E-07 | 1 |
| ZnO | 30 | Daudi   | Fe6:ZnO  | 20 | Daudi   | -1,33E-13 | 11,03235 | -1,20E-14 | 1        | 0 |
| ZnO | 30 | Daudi   | Fe6:ZnO  | 30 | IST-EBV | -42,32797 | 11,03235 | -3,83671  | 0,11323  | 0 |
| ZnO | 30 | Daudi   | Fe6:ZnO  | 30 | Daudi   | -5,37E-14 | 11,03235 | -4,87E-15 | 1        | 0 |
| ZnO | 30 | Daudi   | Fe6:ZnO  | 40 | IST-EBV | -10,75259 | 13,51182 | -0,79579  | 1        | 0 |
| ZnO | 30 | Daudi   | Fe6:ZnO  | 40 | Daudi   | -2,75E-14 | 13,51182 | -2,04E-15 | 1        | 0 |
| ZnO | 30 | Daudi   | Fe12:ZnO | 0  | IST-EBV | -100      | 11,03235 | -9,06425  | 5,47E-11 | 1 |
| ZnO | 30 | Daudi   | Fe12:ZnO | 0  | Daudi   | -100      | 11,03235 | -9,06425  | 5,47E-11 | 1 |
| ZnO | 30 | Daudi   | Fe12:ZnO | 10 | IST-EBV | -74,17965 | 11,9163  | -6,22506  | 1,15E-05 | 1 |
| ZnO | 30 | Daudi   | Fe12:ZnO | 10 | Daudi   | -47,53595 | 11,9163  | -3,98915  | 0,06714  | 0 |
| ZnO | 30 | Daudi   | Fe12:ZnO | 20 | IST-EBV | -66,20226 | 11,9163  | -5,5556   | 1,80E-04 | 1 |
| ZnO | 30 | Daudi   | Fe12:ZnO | 20 | Daudi   | -5,82E-14 | 11,9163  | -4,88E-15 | 1        | 0 |
| ZnO | 30 | Daudi   | Fe12:ZnO | 30 | IST-EBV | -51,1413  | 11,9163  | -4,29171  | 0,02304  | 1 |
| ZnO | 30 | Daudi   | Fe12:ZnO | 30 | Daudi   | -0,56189  | 11,9163  | -0,04715  | 1        | 0 |
| ZnO | 30 | Daudi   | Fe12:ZnO | 40 | IST-EBV | -33,22457 | 11,9163  | -2,78816  | 1        | 0 |
| ZnO | 30 | Daudi   | Fe12:ZnO | 40 | Daudi   | -0,12433  | 11,9163  | -0,01043  | 1        | 0 |
| ZnO | 40 | IST-EBV | ZnO      | 40 | Daudi   | 3,22916   | 15,6021  | 0,20697   | 1        | 0 |
| ZnO | 40 | IST-EBV | Fe6:ZnO  | 0  | IST-EBV | -96,77084 | 13,51182 | -7,16194  | 2,13E-07 | 1 |
| ZnO | 40 | IST-EBV | Fe6:ZnO  | 0  | Daudi   | -96,77084 | 13,51182 | -7,16194  | 2,13E-07 | 1 |
| ZnO | 40 | IST-EBV | Fe6:ZnO  | 10 | IST-EBV | -80,15494 | 13,51182 | -5,93221  | 3,87E-05 | 1 |
| ZnO | 40 | IST-EBV | Fe6:ZnO  | 10 | Daudi   | -19,97297 | 13,51182 | -1,47819  | 1        | 0 |
| ZnO | 40 | IST-EBV | Fe6:ZnO  | 20 | IST-EBV | -74,40669 | 13,51182 | -5,50679  | 2,19E-04 | 1 |
| ZnO | 40 | IST-EBV | Fe6:ZnO  | 20 | Daudi   | 3,22916   | 13,51182 | 0,23899   | 1        | 0 |
| ZnO | 40 | IST-EBV | Fe6:ZnO  | 30 | IST-EBV | -39,09881 | 13,51182 | -2,89368  | 1        | 0 |
| ZnO | 40 | IST-EBV | Fe6:ZnO  | 30 | Daudi   | 3,22916   | 13,51182 | 0,23899   | 1        | 0 |
| ZnO | 40 | IST-EBV | Fe6:ZnO  | 40 | IST-EBV | -7,52344  | 15,6021  | -0,48221  | 1        | 0 |
| ZnO | 40 | IST-EBV | Fe6:ZnO  | 40 | Daudi   | 3,22916   | 15,6021  | 0,20697   | 1        | 0 |
| ZnO | 40 | IST-EBV | Fe12:ZnO | 0  | IST-EBV | -96,77084 | 13,51182 | -7,16194  | 2,13E-07 | 1 |
| ZnO | 40 | IST-EBV | Fe12:ZnO | 0  | Daudi   | -96,77084 | 13,51182 | -7,16194  | 2,13E-07 | 1 |
| ZnO | 40 | IST-EBV | Fe12:ZnO | 10 | IST-EBV | -70,9505  | 14,24271 | -4,98153  | 0,00174  | 1 |
| ZnO | 40 | IST-EBV | Fe12:ZnO | 10 | Daudi   | -44,30679 | 14,24271 | -3,11084  | 1        | 0 |

|         |    |         |          |    |         |           |          |           |          |   |
|---------|----|---------|----------|----|---------|-----------|----------|-----------|----------|---|
| ZnO     | 40 | IST-EBV | Fe12:ZnO | 20 | IST-EBV | -62,9731  | 14,24271 | -4,42143  | 0,01439  | 1 |
| ZnO     | 40 | IST-EBV | Fe12:ZnO | 20 | Daudi   | 3,22916   | 14,24271 | 0,22672   | 1        | 0 |
| ZnO     | 40 | IST-EBV | Fe12:ZnO | 30 | IST-EBV | -47,91214 | 14,24271 | -3,36398  | 0,53059  | 0 |
| ZnO     | 40 | IST-EBV | Fe12:ZnO | 30 | Daudi   | 2,66727   | 14,24271 | 0,18727   | 1        | 0 |
| ZnO     | 40 | IST-EBV | Fe12:ZnO | 40 | IST-EBV | -29,99541 | 14,24271 | -2,10602  | 1        | 0 |
| ZnO     | 40 | IST-EBV | Fe12:ZnO | 40 | Daudi   | 3,10483   | 14,24271 | 0,21799   | 1        | 0 |
| ZnO     | 40 | Daudi   | Fe6:ZnO  | 0  | IST-EBV | -100      | 13,51182 | -7,40093  | 7,59E-08 | 1 |
| ZnO     | 40 | Daudi   | Fe6:ZnO  | 0  | Daudi   | -100      | 13,51182 | -7,40093  | 7,59E-08 | 1 |
| ZnO     | 40 | Daudi   | Fe6:ZnO  | 10 | IST-EBV | -83,3841  | 13,51182 | -6,1712   | 1,43E-05 | 1 |
| ZnO     | 40 | Daudi   | Fe6:ZnO  | 10 | Daudi   | -23,20213 | 13,51182 | -1,71717  | 1        | 0 |
| ZnO     | 40 | Daudi   | Fe6:ZnO  | 20 | IST-EBV | -77,63584 | 13,51182 | -5,74577  | 8,32E-05 | 1 |
| ZnO     | 40 | Daudi   | Fe6:ZnO  | 20 | Daudi   | 2,51E-13  | 13,51182 | 1,86E-14  | 1        | 0 |
| ZnO     | 40 | Daudi   | Fe6:ZnO  | 30 | IST-EBV | -42,32797 | 13,51182 | -3,13266  | 1        | 0 |
| ZnO     | 40 | Daudi   | Fe6:ZnO  | 30 | Daudi   | 3,30E-13  | 13,51182 | 2,44E-14  | 1        | 0 |
| ZnO     | 40 | Daudi   | Fe6:ZnO  | 40 | IST-EBV | -10,75259 | 15,6021  | -0,68918  | 1        | 0 |
| ZnO     | 40 | Daudi   | Fe6:ZnO  | 40 | Daudi   | 3,56E-13  | 15,6021  | 2,28E-14  | 1        | 0 |
| ZnO     | 40 | Daudi   | Fe12:ZnO | 0  | IST-EBV | -100      | 13,51182 | -7,40093  | 7,59E-08 | 1 |
| ZnO     | 40 | Daudi   | Fe12:ZnO | 0  | Daudi   | -100      | 13,51182 | -7,40093  | 7,59E-08 | 1 |
| ZnO     | 40 | Daudi   | Fe12:ZnO | 10 | IST-EBV | -74,17965 | 14,24271 | -5,20826  | 7,20E-04 | 1 |
| ZnO     | 40 | Daudi   | Fe12:ZnO | 10 | Daudi   | -47,53595 | 14,24271 | -3,33756  | 0,57633  | 0 |
| ZnO     | 40 | Daudi   | Fe12:ZnO | 20 | IST-EBV | -66,20226 | 14,24271 | -4,64815  | 0,00621  | 1 |
| ZnO     | 40 | Daudi   | Fe12:ZnO | 20 | Daudi   | 3,26E-13  | 14,24271 | 2,29E-14  | 1        | 0 |
| ZnO     | 40 | Daudi   | Fe12:ZnO | 30 | IST-EBV | -51,1413  | 14,24271 | -3,5907   | 0,25676  | 0 |
| ZnO     | 40 | Daudi   | Fe12:ZnO | 30 | Daudi   | -0,56189  | 14,24271 | -0,03945  | 1        | 0 |
| ZnO     | 40 | Daudi   | Fe12:ZnO | 40 | IST-EBV | -33,22457 | 14,24271 | -2,33274  | 1        | 0 |
| ZnO     | 40 | Daudi   | Fe12:ZnO | 40 | Daudi   | -0,12433  | 14,24271 | -0,00873  | 1        | 0 |
| Fe6:ZnO | 0  | IST-EBV | Fe6:ZnO  | 0  | Daudi   | 7,11E-14  | 11,03235 | 6,44E-15  | 1        | 0 |
| Fe6:ZnO | 0  | IST-EBV | Fe6:ZnO  | 10 | IST-EBV | 16,6159   | 11,03235 | 1,50611   | 1        | 0 |
| Fe6:ZnO | 0  | IST-EBV | Fe6:ZnO  | 10 | Daudi   | 76,79787  | 11,03235 | 6,96115   | 5,05E-07 | 1 |
| Fe6:ZnO | 0  | IST-EBV | Fe6:ZnO  | 20 | IST-EBV | 22,36416  | 11,03235 | 2,02714   | 1        | 0 |
| Fe6:ZnO | 0  | IST-EBV | Fe6:ZnO  | 20 | Daudi   | 100       | 11,03235 | 9,06425   | 5,47E-11 | 1 |
| Fe6:ZnO | 0  | IST-EBV | Fe6:ZnO  | 30 | IST-EBV | 57,67203  | 11,03235 | 5,22754   | 6,67E-04 | 1 |
| Fe6:ZnO | 0  | IST-EBV | Fe6:ZnO  | 30 | Daudi   | 100       | 11,03235 | 9,06425   | 5,47E-11 | 1 |
| Fe6:ZnO | 0  | IST-EBV | Fe6:ZnO  | 40 | IST-EBV | 89,24741  | 13,51182 | 6,60514   | 2,31E-06 | 1 |
| Fe6:ZnO | 0  | IST-EBV | Fe6:ZnO  | 40 | Daudi   | 100       | 13,51182 | 7,40093   | 7,59E-08 | 1 |
| Fe6:ZnO | 0  | IST-EBV | Fe12:ZnO | 0  | IST-EBV | -5,68E-14 | 11,03235 | -5,15E-15 | 1        | 0 |
| Fe6:ZnO | 0  | IST-EBV | Fe12:ZnO | 0  | Daudi   | -8,53E-14 | 11,03235 | -7,73E-15 | 1        | 0 |
| Fe6:ZnO | 0  | IST-EBV | Fe12:ZnO | 10 | IST-EBV | 25,82035  | 11,9163  | 2,16681   | 1        | 0 |
| Fe6:ZnO | 0  | IST-EBV | Fe12:ZnO | 10 | Daudi   | 52,46405  | 11,9163  | 4,40271   | 0,0154   | 1 |
| Fe6:ZnO | 0  | IST-EBV | Fe12:ZnO | 20 | IST-EBV | 33,79774  | 11,9163  | 2,83626   | 1        | 0 |
| Fe6:ZnO | 0  | IST-EBV | Fe12:ZnO | 20 | Daudi   | 100       | 11,9163  | 8,39186   | 1,02E-09 | 1 |
| Fe6:ZnO | 0  | IST-EBV | Fe12:ZnO | 30 | IST-EBV | 48,8587   | 11,9163  | 4,10016   | 0,04557  | 1 |
| Fe6:ZnO | 0  | IST-EBV | Fe12:ZnO | 30 | Daudi   | 99,43811  | 11,9163  | 8,34471   | 1,26E-09 | 1 |
| Fe6:ZnO | 0  | IST-EBV | Fe12:ZnO | 40 | IST-EBV | 66,77543  | 11,9163  | 5,6037    | 1,48E-04 | 1 |
| Fe6:ZnO | 0  | IST-EBV | Fe12:ZnO | 40 | Daudi   | 99,87567  | 11,9163  | 8,38143   | 1,07E-09 | 1 |
| Fe6:ZnO | 0  | Daudi   | Fe6:ZnO  | 10 | IST-EBV | 16,6159   | 11,03235 | 1,50611   | 1        | 0 |

|         |    |         |          |    |         |           |          |           |          |   |
|---------|----|---------|----------|----|---------|-----------|----------|-----------|----------|---|
| Fe6:ZnO | 0  | Daudi   | Fe6:ZnO  | 10 | Daudi   | 76,79787  | 11,03235 | 6,96115   | 5,05E-07 | 1 |
| Fe6:ZnO | 0  | Daudi   | Fe6:ZnO  | 20 | IST-EBV | 22,36416  | 11,03235 | 2,02714   | 1        | 0 |
| Fe6:ZnO | 0  | Daudi   | Fe6:ZnO  | 20 | Daudi   | 100       | 11,03235 | 9,06425   | 5,47E-11 | 1 |
| Fe6:ZnO | 0  | Daudi   | Fe6:ZnO  | 30 | IST-EBV | 57,67203  | 11,03235 | 5,22754   | 6,67E-04 | 1 |
| Fe6:ZnO | 0  | Daudi   | Fe6:ZnO  | 30 | Daudi   | 100       | 11,03235 | 9,06425   | 5,47E-11 | 1 |
| Fe6:ZnO | 0  | Daudi   | Fe6:ZnO  | 40 | IST-EBV | 89,24741  | 13,51182 | 6,60514   | 2,31E-06 | 1 |
| Fe6:ZnO | 0  | Daudi   | Fe6:ZnO  | 40 | Daudi   | 100       | 13,51182 | 7,40093   | 7,59E-08 | 1 |
| Fe6:ZnO | 0  | Daudi   | Fe12:ZnO | 0  | IST-EBV | -1,28E-13 | 11,03235 | -1,16E-14 | 1        | 0 |
| Fe6:ZnO | 0  | Daudi   | Fe12:ZnO | 0  | Daudi   | -1,56E-13 | 11,03235 | -1,42E-14 | 1        | 0 |
| Fe6:ZnO | 0  | Daudi   | Fe12:ZnO | 10 | IST-EBV | 25,82035  | 11,9163  | 2,16681   | 1        | 0 |
| Fe6:ZnO | 0  | Daudi   | Fe12:ZnO | 10 | Daudi   | 52,46405  | 11,9163  | 4,40271   | 0,0154   | 1 |
| Fe6:ZnO | 0  | Daudi   | Fe12:ZnO | 20 | IST-EBV | 33,79774  | 11,9163  | 2,83626   | 1        | 0 |
| Fe6:ZnO | 0  | Daudi   | Fe12:ZnO | 20 | Daudi   | 100       | 11,9163  | 8,39186   | 1,02E-09 | 1 |
| Fe6:ZnO | 0  | Daudi   | Fe12:ZnO | 30 | IST-EBV | 48,8587   | 11,9163  | 4,10016   | 0,04557  | 1 |
| Fe6:ZnO | 0  | Daudi   | Fe12:ZnO | 30 | Daudi   | 99,43811  | 11,9163  | 8,34471   | 1,26E-09 | 1 |
| Fe6:ZnO | 0  | Daudi   | Fe12:ZnO | 40 | IST-EBV | 66,77543  | 11,9163  | 5,6037    | 1,48E-04 | 1 |
| Fe6:ZnO | 0  | Daudi   | Fe12:ZnO | 40 | Daudi   | 99,87567  | 11,9163  | 8,38143   | 1,07E-09 | 1 |
| Fe6:ZnO | 10 | IST-EBV | Fe6:ZnO  | 10 | Daudi   | 60,18197  | 11,03235 | 5,45504   | 2,70E-04 | 1 |
| Fe6:ZnO | 10 | IST-EBV | Fe6:ZnO  | 20 | IST-EBV | 5,74825   | 11,03235 | 0,52104   | 1        | 0 |
| Fe6:ZnO | 10 | IST-EBV | Fe6:ZnO  | 20 | Daudi   | 83,3841   | 11,03235 | 7,55814   | 3,84E-08 | 1 |
| Fe6:ZnO | 10 | IST-EBV | Fe6:ZnO  | 30 | IST-EBV | 41,05613  | 11,03235 | 3,72143   | 0,16683  | 0 |
| Fe6:ZnO | 10 | IST-EBV | Fe6:ZnO  | 30 | Daudi   | 83,3841   | 11,03235 | 7,55814   | 3,84E-08 | 1 |
| Fe6:ZnO | 10 | IST-EBV | Fe6:ZnO  | 40 | IST-EBV | 72,6315   | 13,51182 | 5,37541   | 3,71E-04 | 1 |
| Fe6:ZnO | 10 | IST-EBV | Fe6:ZnO  | 40 | Daudi   | 83,3841   | 13,51182 | 6,1712    | 1,43E-05 | 1 |
| Fe6:ZnO | 10 | IST-EBV | Fe12:ZnO | 0  | IST-EBV | -16,6159  | 11,03235 | -1,50611  | 1        | 0 |
| Fe6:ZnO | 10 | IST-EBV | Fe12:ZnO | 0  | Daudi   | -16,6159  | 11,03235 | -1,50611  | 1        | 0 |
| Fe6:ZnO | 10 | IST-EBV | Fe12:ZnO | 10 | IST-EBV | 9,20444   | 11,9163  | 0,77242   | 1        | 0 |
| Fe6:ZnO | 10 | IST-EBV | Fe12:ZnO | 10 | Daudi   | 35,84815  | 11,9163  | 3,00833   | 1        | 0 |
| Fe6:ZnO | 10 | IST-EBV | Fe12:ZnO | 20 | IST-EBV | 17,18183  | 11,9163  | 1,44188   | 1        | 0 |
| Fe6:ZnO | 10 | IST-EBV | Fe12:ZnO | 20 | Daudi   | 83,3841   | 11,9163  | 6,99748   | 4,32E-07 | 1 |
| Fe6:ZnO | 10 | IST-EBV | Fe12:ZnO | 30 | IST-EBV | 32,2428   | 11,9163  | 2,70577   | 1        | 0 |
| Fe6:ZnO | 10 | IST-EBV | Fe12:ZnO | 30 | Daudi   | 82,82221  | 11,9163  | 6,95033   | 5,29E-07 | 1 |
| Fe6:ZnO | 10 | IST-EBV | Fe12:ZnO | 40 | IST-EBV | 50,15953  | 11,9163  | 4,20932   | 0,03096  | 1 |
| Fe6:ZnO | 10 | IST-EBV | Fe12:ZnO | 40 | Daudi   | 83,25977  | 11,9163  | 6,98705   | 4,52E-07 | 1 |
| Fe6:ZnO | 10 | Daudi   | Fe6:ZnO  | 20 | IST-EBV | -54,43371 | 11,03235 | -4,93401  | 0,0021   | 1 |
| Fe6:ZnO | 10 | Daudi   | Fe6:ZnO  | 20 | Daudi   | 23,20213  | 11,03235 | 2,1031    | 1        | 0 |
| Fe6:ZnO | 10 | Daudi   | Fe6:ZnO  | 30 | IST-EBV | -19,12584 | 11,03235 | -1,73361  | 1        | 0 |
| Fe6:ZnO | 10 | Daudi   | Fe6:ZnO  | 30 | Daudi   | 23,20213  | 11,03235 | 2,1031    | 1        | 0 |
| Fe6:ZnO | 10 | Daudi   | Fe6:ZnO  | 40 | IST-EBV | 12,44954  | 13,51182 | 0,92138   | 1        | 0 |
| Fe6:ZnO | 10 | Daudi   | Fe6:ZnO  | 40 | Daudi   | 23,20213  | 13,51182 | 1,71717   | 1        | 0 |
| Fe6:ZnO | 10 | Daudi   | Fe12:ZnO | 0  | IST-EBV | -76,79787 | 11,03235 | -6,96115  | 5,05E-07 | 1 |
| Fe6:ZnO | 10 | Daudi   | Fe12:ZnO | 0  | Daudi   | -76,79787 | 11,03235 | -6,96115  | 5,05E-07 | 1 |
| Fe6:ZnO | 10 | Daudi   | Fe12:ZnO | 10 | IST-EBV | -50,97752 | 11,9163  | -4,27796  | 0,02421  | 1 |
| Fe6:ZnO | 10 | Daudi   | Fe12:ZnO | 10 | Daudi   | -24,33381 | 11,9163  | -2,04206  | 1        | 0 |
| Fe6:ZnO | 10 | Daudi   | Fe12:ZnO | 20 | IST-EBV | -43,00013 | 11,9163  | -3,60851  | 0,24224  | 0 |
| Fe6:ZnO | 10 | Daudi   | Fe12:ZnO | 20 | Daudi   | 23,20213  | 11,9163  | 1,94709   | 1        | 0 |



|         |    |         |          |    |         |           |          |          |          |   |
|---------|----|---------|----------|----|---------|-----------|----------|----------|----------|---|
| Fe6:ZnO | 10 | Daudi   | Fe12:ZnO | 30 | IST-EBV | -27,93916 | 11,9163  | -2,34462 | 1        | 0 |
| Fe6:ZnO | 10 | Daudi   | Fe12:ZnO | 30 | Daudi   | 22,64024  | 11,9163  | 1,89994  | 1        | 0 |
| Fe6:ZnO | 10 | Daudi   | Fe12:ZnO | 40 | IST-EBV | -10,02243 | 11,9163  | -0,84107 | 1        | 0 |
| Fe6:ZnO | 10 | Daudi   | Fe12:ZnO | 40 | Daudi   | 23,0778   | 11,9163  | 1,93666  | 1        | 0 |
| Fe6:ZnO | 20 | IST-EBV | Fe6:ZnO  | 20 | Daudi   | 77,63584  | 11,03235 | 7,03711  | 3,65E-07 | 1 |
| Fe6:ZnO | 20 | IST-EBV | Fe6:ZnO  | 30 | IST-EBV | 35,30787  | 11,03235 | 3,20039  | 0,87976  | 0 |
| Fe6:ZnO | 20 | IST-EBV | Fe6:ZnO  | 30 | Daudi   | 77,63584  | 11,03235 | 7,03711  | 3,65E-07 | 1 |
| Fe6:ZnO | 20 | IST-EBV | Fe6:ZnO  | 40 | IST-EBV | 66,88325  | 13,51182 | 4,94998  | 0,00197  | 1 |
| Fe6:ZnO | 20 | IST-EBV | Fe6:ZnO  | 40 | Daudi   | 77,63584  | 13,51182 | 5,74577  | 8,32E-05 | 1 |
| Fe6:ZnO | 20 | IST-EBV | Fe12:ZnO | 0  | IST-EBV | -22,36416 | 11,03235 | -2,02714 | 1        | 0 |
| Fe6:ZnO | 20 | IST-EBV | Fe12:ZnO | 0  | Daudi   | -22,36416 | 11,03235 | -2,02714 | 1        | 0 |
| Fe6:ZnO | 20 | IST-EBV | Fe12:ZnO | 10 | IST-EBV | 3,45619   | 11,9163  | 0,29004  | 1        | 0 |
| Fe6:ZnO | 20 | IST-EBV | Fe12:ZnO | 10 | Daudi   | 30,0999   | 11,9163  | 2,52594  | 1        | 0 |
| Fe6:ZnO | 20 | IST-EBV | Fe12:ZnO | 20 | IST-EBV | 11,43358  | 11,9163  | 0,95949  | 1        | 0 |
| Fe6:ZnO | 20 | IST-EBV | Fe12:ZnO | 20 | Daudi   | 77,63584  | 11,9163  | 6,51509  | 3,38E-06 | 1 |
| Fe6:ZnO | 20 | IST-EBV | Fe12:ZnO | 30 | IST-EBV | 26,49455  | 11,9163  | 2,22339  | 1        | 0 |
| Fe6:ZnO | 20 | IST-EBV | Fe12:ZnO | 30 | Daudi   | 77,07395  | 11,9163  | 6,46794  | 4,13E-06 | 1 |
| Fe6:ZnO | 20 | IST-EBV | Fe12:ZnO | 40 | IST-EBV | 44,41128  | 11,9163  | 3,72693  | 0,1638   | 0 |
| Fe6:ZnO | 20 | IST-EBV | Fe12:ZnO | 40 | Daudi   | 77,51151  | 11,9163  | 6,50466  | 3,53E-06 | 1 |
| Fe6:ZnO | 20 | Daudi   | Fe6:ZnO  | 30 | IST-EBV | -42,32797 | 11,03235 | -3,83671 | 0,11323  | 0 |
| Fe6:ZnO | 20 | Daudi   | Fe6:ZnO  | 30 | Daudi   | 7,90E-14  | 11,03235 | 7,17E-15 | 1        | 0 |
| Fe6:ZnO | 20 | Daudi   | Fe6:ZnO  | 40 | IST-EBV | -10,75259 | 13,51182 | -0,79579 | 1        | 0 |
| Fe6:ZnO | 20 | Daudi   | Fe6:ZnO  | 40 | Daudi   | 1,05E-13  | 13,51182 | 7,79E-15 | 1        | 0 |
| Fe6:ZnO | 20 | Daudi   | Fe12:ZnO | 0  | IST-EBV | -100      | 11,03235 | -9,06425 | 5,47E-11 | 1 |
| Fe6:ZnO | 20 | Daudi   | Fe12:ZnO | 0  | Daudi   | -100      | 11,03235 | -9,06425 | 5,47E-11 | 1 |
| Fe6:ZnO | 20 | Daudi   | Fe12:ZnO | 10 | IST-EBV | -74,17965 | 11,9163  | -6,22506 | 1,15E-05 | 1 |
| Fe6:ZnO | 20 | Daudi   | Fe12:ZnO | 10 | Daudi   | -47,53595 | 11,9163  | -3,98915 | 0,06714  | 0 |
| Fe6:ZnO | 20 | Daudi   | Fe12:ZnO | 20 | IST-EBV | -66,20226 | 11,9163  | -5,5556  | 1,80E-04 | 1 |
| Fe6:ZnO | 20 | Daudi   | Fe12:ZnO | 20 | Daudi   | 7,46E-14  | 11,9163  | 6,26E-15 | 1        | 0 |
| Fe6:ZnO | 20 | Daudi   | Fe12:ZnO | 30 | IST-EBV | -51,1413  | 11,9163  | -4,29171 | 0,02304  | 1 |
| Fe6:ZnO | 20 | Daudi   | Fe12:ZnO | 30 | Daudi   | -0,56189  | 11,9163  | -0,04715 | 1        | 0 |
| Fe6:ZnO | 20 | Daudi   | Fe12:ZnO | 40 | IST-EBV | -33,22457 | 11,9163  | -2,78816 | 1        | 0 |
| Fe6:ZnO | 20 | Daudi   | Fe12:ZnO | 40 | Daudi   | -0,12433  | 11,9163  | -0,01043 | 1        | 0 |
| Fe6:ZnO | 30 | IST-EBV | Fe6:ZnO  | 30 | Daudi   | 42,32797  | 11,03235 | 3,83671  | 0,11323  | 0 |
| Fe6:ZnO | 30 | IST-EBV | Fe6:ZnO  | 40 | IST-EBV | 31,57538  | 13,51182 | 2,33687  | 1        | 0 |
| Fe6:ZnO | 30 | IST-EBV | Fe6:ZnO  | 40 | Daudi   | 42,32797  | 13,51182 | 3,13266  | 1        | 0 |
| Fe6:ZnO | 30 | IST-EBV | Fe12:ZnO | 0  | IST-EBV | -57,67203 | 11,03235 | -5,22754 | 6,67E-04 | 1 |
| Fe6:ZnO | 30 | IST-EBV | Fe12:ZnO | 0  | Daudi   | -57,67203 | 11,03235 | -5,22754 | 6,67E-04 | 1 |
| Fe6:ZnO | 30 | IST-EBV | Fe12:ZnO | 10 | IST-EBV | -31,85168 | 11,9163  | -2,67295 | 1        | 0 |
| Fe6:ZnO | 30 | IST-EBV | Fe12:ZnO | 10 | Daudi   | -5,20797  | 11,9163  | -0,43705 | 1        | 0 |
| Fe6:ZnO | 30 | IST-EBV | Fe12:ZnO | 20 | IST-EBV | -23,87429 | 11,9163  | -2,0035  | 1        | 0 |
| Fe6:ZnO | 30 | IST-EBV | Fe12:ZnO | 20 | Daudi   | 42,32797  | 11,9163  | 3,55211  | 0,29111  | 0 |
| Fe6:ZnO | 30 | IST-EBV | Fe12:ZnO | 30 | IST-EBV | -8,81332  | 11,9163  | -0,7396  | 1        | 0 |
| Fe6:ZnO | 30 | IST-EBV | Fe12:ZnO | 30 | Daudi   | 41,76608  | 11,9163  | 3,50495  | 0,339    | 0 |
| Fe6:ZnO | 30 | IST-EBV | Fe12:ZnO | 40 | IST-EBV | 9,10341   | 11,9163  | 0,76395  | 1        | 0 |
| Fe6:ZnO | 30 | IST-EBV | Fe12:ZnO | 40 | Daudi   | 42,20364  | 11,9163  | 3,54167  | 0,30112  | 0 |

|          |    |         |          |    |         |           |          |           |          |   |
|----------|----|---------|----------|----|---------|-----------|----------|-----------|----------|---|
| Fe6:ZnO  | 30 | Daudi   | Fe6:ZnO  | 40 | IST-EBV | -10,75259 | 13,51182 | -0,79579  | 1        | 0 |
| Fe6:ZnO  | 30 | Daudi   | Fe6:ZnO  | 40 | Daudi   | 2,62E-14  | 13,51182 | 1,94E-15  | 1        | 0 |
| Fe6:ZnO  | 30 | Daudi   | Fe12:ZnO | 0  | IST-EBV | -100      | 11,03235 | -9,06425  | 5,47E-11 | 1 |
| Fe6:ZnO  | 30 | Daudi   | Fe12:ZnO | 0  | Daudi   | -100      | 11,03235 | -9,06425  | 5,47E-11 | 1 |
| Fe6:ZnO  | 30 | Daudi   | Fe12:ZnO | 10 | IST-EBV | -74,17965 | 11,9163  | -6,22506  | 1,15E-05 | 1 |
| Fe6:ZnO  | 30 | Daudi   | Fe12:ZnO | 10 | Daudi   | -47,53595 | 11,9163  | -3,98915  | 0,06714  | 0 |
| Fe6:ZnO  | 30 | Daudi   | Fe12:ZnO | 20 | IST-EBV | -66,20226 | 11,9163  | -5,5556   | 1,80E-04 | 1 |
| Fe6:ZnO  | 30 | Daudi   | Fe12:ZnO | 20 | Daudi   | -4,44E-15 | 11,9163  | -3,73E-16 | 1        | 0 |
| Fe6:ZnO  | 30 | Daudi   | Fe12:ZnO | 30 | IST-EBV | -51,1413  | 11,9163  | -4,29171  | 0,02304  | 1 |
| Fe6:ZnO  | 30 | Daudi   | Fe12:ZnO | 30 | Daudi   | -0,56189  | 11,9163  | -0,04715  | 1        | 0 |
| Fe6:ZnO  | 30 | Daudi   | Fe12:ZnO | 40 | IST-EBV | -33,22457 | 11,9163  | -2,78816  | 1        | 0 |
| Fe6:ZnO  | 30 | Daudi   | Fe12:ZnO | 40 | Daudi   | -0,12433  | 11,9163  | -0,01043  | 1        | 0 |
| Fe6:ZnO  | 40 | IST-EBV | Fe6:ZnO  | 40 | Daudi   | 10,75259  | 15,6021  | 0,68918   | 1        | 0 |
| Fe6:ZnO  | 40 | IST-EBV | Fe12:ZnO | 0  | IST-EBV | -89,24741 | 13,51182 | -6,60514  | 2,31E-06 | 1 |
| Fe6:ZnO  | 40 | IST-EBV | Fe12:ZnO | 0  | Daudi   | -89,24741 | 13,51182 | -6,60514  | 2,31E-06 | 1 |
| Fe6:ZnO  | 40 | IST-EBV | Fe12:ZnO | 10 | IST-EBV | -63,42706 | 14,24271 | -4,4533   | 0,0128   | 1 |
| Fe6:ZnO  | 40 | IST-EBV | Fe12:ZnO | 10 | Daudi   | -36,78335 | 14,24271 | -2,58261  | 1        | 0 |
| Fe6:ZnO  | 40 | IST-EBV | Fe12:ZnO | 20 | IST-EBV | -55,44967 | 14,24271 | -3,8932   | 0,09342  | 0 |
| Fe6:ZnO  | 40 | IST-EBV | Fe12:ZnO | 20 | Daudi   | 10,75259  | 14,24271 | 0,75495   | 1        | 0 |
| Fe6:ZnO  | 40 | IST-EBV | Fe12:ZnO | 30 | IST-EBV | -40,3887  | 14,24271 | -2,83575  | 1        | 0 |
| Fe6:ZnO  | 40 | IST-EBV | Fe12:ZnO | 30 | Daudi   | 10,1907   | 14,24271 | 0,7155    | 1        | 0 |
| Fe6:ZnO  | 40 | IST-EBV | Fe12:ZnO | 40 | IST-EBV | -22,47197 | 14,24271 | -1,57779  | 1        | 0 |
| Fe6:ZnO  | 40 | IST-EBV | Fe12:ZnO | 40 | Daudi   | 10,62826  | 14,24271 | 0,74622   | 1        | 0 |
| Fe6:ZnO  | 40 | Daudi   | Fe12:ZnO | 0  | IST-EBV | -100      | 13,51182 | -7,40093  | 7,59E-08 | 1 |
| Fe6:ZnO  | 40 | Daudi   | Fe12:ZnO | 0  | Daudi   | -100      | 13,51182 | -7,40093  | 7,59E-08 | 1 |
| Fe6:ZnO  | 40 | Daudi   | Fe12:ZnO | 10 | IST-EBV | -74,17965 | 14,24271 | -5,20826  | 7,20E-04 | 1 |
| Fe6:ZnO  | 40 | Daudi   | Fe12:ZnO | 10 | Daudi   | -47,53595 | 14,24271 | -3,33756  | 0,57633  | 0 |
| Fe6:ZnO  | 40 | Daudi   | Fe12:ZnO | 20 | IST-EBV | -66,20226 | 14,24271 | -4,64815  | 0,00621  | 1 |
| Fe6:ZnO  | 40 | Daudi   | Fe12:ZnO | 20 | Daudi   | -3,06E-14 | 14,24271 | -2,15E-15 | 1        | 0 |
| Fe6:ZnO  | 40 | Daudi   | Fe12:ZnO | 30 | IST-EBV | -51,1413  | 14,24271 | -3,5907   | 0,25676  | 0 |
| Fe6:ZnO  | 40 | Daudi   | Fe12:ZnO | 30 | Daudi   | -0,56189  | 14,24271 | -0,03945  | 1        | 0 |
| Fe6:ZnO  | 40 | Daudi   | Fe12:ZnO | 40 | IST-EBV | -33,22457 | 14,24271 | -2,33274  | 1        | 0 |
| Fe6:ZnO  | 40 | Daudi   | Fe12:ZnO | 40 | Daudi   | -0,12433  | 14,24271 | -0,00873  | 1        | 0 |
| Fe12:ZnO | 0  | IST-EBV | Fe12:ZnO | 0  | Daudi   | -2,84E-14 | 11,03235 | -2,58E-15 | 1        | 0 |
| Fe12:ZnO | 0  | IST-EBV | Fe12:ZnO | 10 | IST-EBV | 25,82035  | 11,9163  | 2,16681   | 1        | 0 |
| Fe12:ZnO | 0  | IST-EBV | Fe12:ZnO | 10 | Daudi   | 52,46405  | 11,9163  | 4,40271   | 0,0154   | 1 |
| Fe12:ZnO | 0  | IST-EBV | Fe12:ZnO | 20 | IST-EBV | 33,79774  | 11,9163  | 2,83626   | 1        | 0 |
| Fe12:ZnO | 0  | IST-EBV | Fe12:ZnO | 20 | Daudi   | 100       | 11,9163  | 8,39186   | 1,02E-09 | 1 |
| Fe12:ZnO | 0  | IST-EBV | Fe12:ZnO | 30 | IST-EBV | 48,8587   | 11,9163  | 4,10016   | 0,04557  | 1 |
| Fe12:ZnO | 0  | IST-EBV | Fe12:ZnO | 30 | Daudi   | 99,43811  | 11,9163  | 8,34471   | 1,26E-09 | 1 |
| Fe12:ZnO | 0  | IST-EBV | Fe12:ZnO | 40 | IST-EBV | 66,77543  | 11,9163  | 5,6037    | 1,48E-04 | 1 |
| Fe12:ZnO | 0  | IST-EBV | Fe12:ZnO | 40 | Daudi   | 99,87567  | 11,9163  | 8,38143   | 1,07E-09 | 1 |
| Fe12:ZnO | 0  | Daudi   | Fe12:ZnO | 10 | IST-EBV | 25,82035  | 11,9163  | 2,16681   | 1        | 0 |
| Fe12:ZnO | 0  | Daudi   | Fe12:ZnO | 10 | Daudi   | 52,46405  | 11,9163  | 4,40271   | 0,0154   | 1 |
| Fe12:ZnO | 0  | Daudi   | Fe12:ZnO | 20 | IST-EBV | 33,79774  | 11,9163  | 2,83626   | 1        | 0 |
| Fe12:ZnO | 0  | Daudi   | Fe12:ZnO | 20 | Daudi   | 100       | 11,9163  | 8,39186   | 1,02E-09 | 1 |

|          |    |         |          |    |         |           |          |          |          |   |
|----------|----|---------|----------|----|---------|-----------|----------|----------|----------|---|
| Fe12:ZnO | 0  | Daudi   | Fe12:ZnO | 30 | IST-EBV | 48,8587   | 11,9163  | 4,10016  | 0,04557  | 1 |
| Fe12:ZnO | 0  | Daudi   | Fe12:ZnO | 30 | Daudi   | 99,43811  | 11,9163  | 8,34471  | 1,26E-09 | 1 |
| Fe12:ZnO | 0  | Daudi   | Fe12:ZnO | 40 | IST-EBV | 66,77543  | 11,9163  | 5,6037   | 1,48E-04 | 1 |
| Fe12:ZnO | 0  | Daudi   | Fe12:ZnO | 40 | Daudi   | 99,87567  | 11,9163  | 8,38143  | 1,07E-09 | 1 |
| Fe12:ZnO | 10 | IST-EBV | Fe12:ZnO | 10 | Daudi   | 26,64371  | 12,73906 | 2,0915   | 1        | 0 |
| Fe12:ZnO | 10 | IST-EBV | Fe12:ZnO | 20 | IST-EBV | 7,97739   | 12,73906 | 0,62621  | 1        | 0 |
| Fe12:ZnO | 10 | IST-EBV | Fe12:ZnO | 20 | Daudi   | 74,17965  | 12,73906 | 5,82301  | 6,06E-05 | 1 |
| Fe12:ZnO | 10 | IST-EBV | Fe12:ZnO | 30 | IST-EBV | 23,03836  | 12,73906 | 1,80848  | 1        | 0 |
| Fe12:ZnO | 10 | IST-EBV | Fe12:ZnO | 30 | Daudi   | 73,61776  | 12,73906 | 5,7789   | 7,26E-05 | 1 |
| Fe12:ZnO | 10 | IST-EBV | Fe12:ZnO | 40 | IST-EBV | 40,95509  | 12,73906 | 3,21492  | 0,84165  | 0 |
| Fe12:ZnO | 10 | IST-EBV | Fe12:ZnO | 40 | Daudi   | 74,05532  | 12,73906 | 5,81325  | 6,31E-05 | 1 |
| Fe12:ZnO | 10 | Daudi   | Fe12:ZnO | 20 | IST-EBV | -18,66632 | 12,73906 | -1,46528 | 1        | 0 |
| Fe12:ZnO | 10 | Daudi   | Fe12:ZnO | 20 | Daudi   | 47,53595  | 12,73906 | 3,73151  | 0,16132  | 0 |
| Fe12:ZnO | 10 | Daudi   | Fe12:ZnO | 30 | IST-EBV | -3,60535  | 12,73906 | -0,28302 | 1        | 0 |
| Fe12:ZnO | 10 | Daudi   | Fe12:ZnO | 30 | Daudi   | 46,97405  | 12,73906 | 3,6874   | 0,18681  | 0 |
| Fe12:ZnO | 10 | Daudi   | Fe12:ZnO | 40 | IST-EBV | 14,31138  | 12,73906 | 1,12342  | 1        | 0 |
| Fe12:ZnO | 10 | Daudi   | Fe12:ZnO | 40 | Daudi   | 47,41161  | 12,73906 | 3,72175  | 0,16666  | 0 |
| Fe12:ZnO | 20 | IST-EBV | Fe12:ZnO | 20 | Daudi   | 66,20226  | 12,73906 | 5,19679  | 7,53E-04 | 1 |
| Fe12:ZnO | 20 | IST-EBV | Fe12:ZnO | 30 | IST-EBV | 15,06097  | 12,73906 | 1,18227  | 1        | 0 |
| Fe12:ZnO | 20 | IST-EBV | Fe12:ZnO | 30 | Daudi   | 65,64037  | 12,73906 | 5,15268  | 8,96E-04 | 1 |
| Fe12:ZnO | 20 | IST-EBV | Fe12:ZnO | 40 | IST-EBV | 32,9777   | 12,73906 | 2,58871  | 1        | 0 |
| Fe12:ZnO | 20 | IST-EBV | Fe12:ZnO | 40 | Daudi   | 66,07793  | 12,73906 | 5,18703  | 7,83E-04 | 1 |
| Fe12:ZnO | 20 | Daudi   | Fe12:ZnO | 30 | IST-EBV | -51,1413  | 12,73906 | -4,01453 | 0,06148  | 0 |
| Fe12:ZnO | 20 | Daudi   | Fe12:ZnO | 30 | Daudi   | -0,56189  | 12,73906 | -0,04411 | 1        | 0 |
| Fe12:ZnO | 20 | Daudi   | Fe12:ZnO | 40 | IST-EBV | -33,22457 | 12,73906 | -2,60809 | 1        | 0 |
| Fe12:ZnO | 20 | Daudi   | Fe12:ZnO | 40 | Daudi   | -0,12433  | 12,73906 | -0,00976 | 1        | 0 |
| Fe12:ZnO | 30 | IST-EBV | Fe12:ZnO | 30 | Daudi   | 50,57941  | 12,73906 | 3,97042  | 0,07164  | 0 |
| Fe12:ZnO | 30 | IST-EBV | Fe12:ZnO | 40 | IST-EBV | 17,91673  | 12,73906 | 1,40644  | 1        | 0 |
| Fe12:ZnO | 30 | IST-EBV | Fe12:ZnO | 40 | Daudi   | 51,01696  | 12,73906 | 4,00477  | 0,0636   | 0 |
| Fe12:ZnO | 30 | Daudi   | Fe12:ZnO | 40 | IST-EBV | -32,66268 | 12,73906 | -2,56398 | 1        | 0 |
| Fe12:ZnO | 30 | Daudi   | Fe12:ZnO | 40 | Daudi   | 0,43756   | 12,73906 | 0,03435  | 1        | 0 |
| Fe12:ZnO | 40 | IST-EBV | Fe12:ZnO | 40 | Daudi   | 33,10023  | 12,73906 | 2,59833  | 1        | 0 |

Three way ANOVA analysis on ZnO and Fe:ZnO NPs uptake experiments on B lymphocytes cell line(Bonferroni t-test).

| Comparison between factor: Nanoparticle |          |            |         |          |         |     |
|-----------------------------------------|----------|------------|---------|----------|---------|-----|
|                                         |          | Mean Diff. | SEM     | t Value  | Prob    | Sig |
| ZnO                                     | Fe6:ZnO  | -15,94     | 6,68932 | -2,3829  | 0,07633 | 0   |
| ZnO                                     | Fe12:ZnO | -24,33333  | 6,68932 | -3,63764 | 0,00393 | 1   |
| Fe6:ZnO                                 | Fe12:ZnO | -8,39333   | 6,68932 | -1,25474 | 0,66497 | 0   |

| Comparison between factor: Incubation time |      |            |        |         |          |     |
|--------------------------------------------|------|------------|--------|---------|----------|-----|
|                                            |      | Mean Diff. | SEM    | t Value | Prob     | Sig |
| 5 h                                        | 24 h | 24,48667   | 5,4618 | 4,48326 | 0,000155 | 1   |

| Comparison between factor: Dose (µg/mL) |    |            |        |          |          |     |
|-----------------------------------------|----|------------|--------|----------|----------|-----|
|                                         |    | Mean Diff. | SEM    | t Value  | Prob     | Sig |
| 10                                      | 20 | -27,96     | 5,4618 | -5,11919 | 3,07E-05 | 1   |

| All pairwise multiple comparisons |            |              |          |            |              |           |          |          |          |     |
|-----------------------------------|------------|--------------|----------|------------|--------------|-----------|----------|----------|----------|-----|
| NP                                | Incubation | Dose (µg/mL) | NP       | Incubation | Dose (µg/mL) | MeanDiff  | SEM      | t Value  | Prob     | Sig |
| ZnO                               | 5h         | --           | ZnO      | 24h        | --           | 20,92667  | 9,46012  | 2,21209  | 0,55091  | 0   |
| ZnO                               | 5h         | --           | Fe6:ZnO  | 5h         | --           | -22,78333 | 9,46012  | -2,40836 | 0,36098  | 0   |
| ZnO                               | 5h         | --           | Fe6:ZnO  | 24h        | --           | 11,83     | 9,46012  | 1,25051  | 1        | 0   |
| ZnO                               | 5h         | --           | Fe12:ZnO | 5h         | --           | -22,83    | 9,46012  | -2,41329 | 0,3571   | 0   |
| ZnO                               | 5h         | --           | Fe12:ZnO | 24h        | --           | -4,91     | 9,46012  | -0,51902 | 1        | 0   |
| ZnO                               | 24h        | --           | Fe6:ZnO  | 5h         | --           | -43,71    | 9,46012  | -4,62045 | 0,00164  | 1   |
| ZnO                               | 24h        | --           | Fe6:ZnO  | 24h        | --           | -9,09667  | 9,46012  | -0,96158 | 1        | 0   |
| ZnO                               | 24h        | --           | Fe12:ZnO | 5h         | --           | -43,75667 | 9,46012  | -4,62538 | 0,00161  | 1   |
| ZnO                               | 24h        | --           | Fe12:ZnO | 24h        | --           | -25,83667 | 9,46012  | -2,73111 | 0,17466  | 0   |
| Fe6:ZnO                           | 5h         | --           | Fe6:ZnO  | 24h        | --           | 34,61333  | 9,46012  | 3,65887  | 0,01862  | 1   |
| Fe6:ZnO                           | 5h         | --           | Fe12:ZnO | 5h         | --           | -0,04667  | 9,46012  | -0,00493 | 1        | 0   |
| Fe6:ZnO                           | 5h         | --           | Fe12:ZnO | 24h        | --           | 17,87333  | 9,46012  | 1,88933  | 1        | 0   |
| Fe6:ZnO                           | 24h        | --           | Fe12:ZnO | 5h         | --           | -34,66    | 9,46012  | -3,6638  | 0,01839  | 1   |
| Fe6:ZnO                           | 24h        | --           | Fe12:ZnO | 24h        | --           | -16,74    | 9,46012  | -1,76953 | 1        | 0   |
| Fe12:ZnO                          | 5h         | --           | Fe12:ZnO | 24h        | --           | 17,92     | 9,46012  | 1,89427  | 1        | 0   |
| ZnO                               | --         | 10           | ZnO      | --         | 20           | -23,63    | 9,46012  | -2,49785 | 0,29622  | 0   |
| ZnO                               | --         | 10           | Fe6:ZnO  | --         | 10           | -14,44167 | 9,46012  | -1,52658 | 1        | 0   |
| ZnO                               | --         | 10           | Fe6:ZnO  | --         | 20           | -41,06833 | 9,46012  | -4,34121 | 0,00333  | 1   |
| ZnO                               | --         | 10           | Fe12:ZnO | --         | 10           | -19,33667 | 9,46012  | -2,04402 | 0,78111  | 0   |
| ZnO                               | --         | 10           | Fe12:ZnO | --         | 20           | -52,96    | 9,46012  | -5,59824 | 1,38E-04 | 1   |
| ZnO                               | --         | 20           | Fe6:ZnO  | --         | 10           | 9,18833   | 9,46012  | 0,97127  | 1        | 0   |
| ZnO                               | --         | 20           | Fe6:ZnO  | --         | 20           | -17,43833 | 9,46012  | -1,84335 | 1        | 0   |
| ZnO                               | --         | 20           | Fe12:ZnO | --         | 10           | 4,29333   | 9,46012  | 0,45383  | 1        | 0   |
| ZnO                               | --         | 20           | Fe12:ZnO | --         | 20           | -29,33    | 9,46012  | -3,10038 | 0,07325  | 0   |
| Fe6:ZnO                           | --         | 10           | Fe6:ZnO  | --         | 20           | -26,62667 | 9,46012  | -2,81462 | 0,14396  | 0   |
| Fe6:ZnO                           | --         | 10           | Fe12:ZnO | --         | 10           | -4,895    | 9,46012  | -0,51744 | 1        | 0   |
| Fe6:ZnO                           | --         | 10           | Fe12:ZnO | --         | 20           | -38,51833 | 9,46012  | -4,07165 | 0,00659  | 1   |
| Fe6:ZnO                           | --         | 20           | Fe12:ZnO | --         | 10           | 21,73167  | 9,46012  | 2,29719  | 0,45951  | 0   |
| Fe6:ZnO                           | --         | 20           | Fe12:ZnO | --         | 20           | -11,89167 | 9,46012  | -1,25703 | 1        | 0   |
| Fe12:ZnO                          | --         | 10           | Fe12:ZnO | --         | 20           | -33,62333 | 9,46012  | -3,55422 | 0,02416  | 1   |
| --                                | 5h         | 10           | --       | 5h         | 20           | -22,89    | 7,72416  | -2,96343 | 0,04061  | 1   |
| --                                | 5h         | 10           | --       | 24h        | 10           | 29,55667  | 7,72416  | 3,82652  | 0,0049   | 1   |
| --                                | 5h         | 10           | --       | 24h        | 20           | -3,47333  | 7,72416  | -0,44967 | 1        | 0   |
| --                                | 5h         | 20           | --       | 24h        | 10           | 52,44667  | 7,72416  | 6,78995  | 3,03E-06 | 1   |
| --                                | 5h         | 20           | --       | 24h        | 20           | 19,41667  | 7,72416  | 2,51376  | 0,11436  | 0   |
| --                                | 24h        | 10           | --       | 24h        | 20           | -33,03    | 7,72416  | -4,27619 | 0,00157  | 1   |
| ZnO                               | 5h         | 10           | ZnO      | 5h         | 20           | -14,77667 | 13,37863 | -1,1045  | 1        | 0   |

|         |     |    |          |     |    |           |          |          |          |   |
|---------|-----|----|----------|-----|----|-----------|----------|----------|----------|---|
| ZnO     | 5h  | 10 | ZnO      | 24h | 10 | 29,78     | 13,37863 | 2,22594  | 1        | 0 |
| ZnO     | 5h  | 10 | ZnO      | 24h | 20 | -2,70333  | 13,37863 | -0,20206 | 1        | 0 |
| ZnO     | 5h  | 10 | Fe6:ZnO  | 5h  | 10 | -19,12    | 13,37863 | -1,42914 | 1        | 0 |
| ZnO     | 5h  | 10 | Fe6:ZnO  | 5h  | 20 | -41,22333 | 13,37863 | -3,08128 | 0,33738  | 0 |
| ZnO     | 5h  | 10 | Fe6:ZnO  | 24h | 10 | 20,01667  | 13,37863 | 1,49617  | 1        | 0 |
| ZnO     | 5h  | 10 | Fe6:ZnO  | 24h | 20 | -11,13333 | 13,37863 | -0,83217 | 1        | 0 |
| ZnO     | 5h  | 10 | Fe12:ZnO | 5h  | 10 | -14,32333 | 13,37863 | -1,07061 | 1        | 0 |
| ZnO     | 5h  | 10 | Fe12:ZnO | 5h  | 20 | -46,11333 | 13,37863 | -3,44679 | 0,13867  | 0 |
| ZnO     | 5h  | 10 | Fe12:ZnO | 24h | 10 | 5,43      | 13,37863 | 0,40587  | 1        | 0 |
| ZnO     | 5h  | 10 | Fe12:ZnO | 24h | 20 | -30,02667 | 13,37863 | -2,24437 | 1        | 0 |
| ZnO     | 5h  | 20 | ZnO      | 24h | 10 | 44,55667  | 13,37863 | 3,33043  | 0,18454  | 0 |
| ZnO     | 5h  | 20 | ZnO      | 24h | 20 | 12,07333  | 13,37863 | 0,90243  | 1        | 0 |
| ZnO     | 5h  | 20 | Fe6:ZnO  | 5h  | 10 | -4,34333  | 13,37863 | -0,32465 | 1        | 0 |
| ZnO     | 5h  | 20 | Fe6:ZnO  | 5h  | 20 | -26,44667 | 13,37863 | -1,97678 | 1        | 0 |
| ZnO     | 5h  | 20 | Fe6:ZnO  | 24h | 10 | 34,79333  | 13,37863 | 2,60066  | 1        | 0 |
| ZnO     | 5h  | 20 | Fe6:ZnO  | 24h | 20 | 3,64333   | 13,37863 | 0,27232  | 1        | 0 |
| ZnO     | 5h  | 20 | Fe12:ZnO | 5h  | 10 | 0,45333   | 13,37863 | 0,03388  | 1        | 0 |
| ZnO     | 5h  | 20 | Fe12:ZnO | 5h  | 20 | -31,33667 | 13,37863 | -2,34229 | 1        | 0 |
| ZnO     | 5h  | 20 | Fe12:ZnO | 24h | 10 | 20,20667  | 13,37863 | 1,51037  | 1        | 0 |
| ZnO     | 5h  | 20 | Fe12:ZnO | 24h | 20 | -15,25    | 13,37863 | -1,13988 | 1        | 0 |
| ZnO     | 24h | 10 | ZnO      | 24h | 20 | -32,48333 | 13,37863 | -2,428   | 1        | 0 |
| ZnO     | 24h | 10 | Fe6:ZnO  | 5h  | 10 | -48,9     | 13,37863 | -3,65508 | 0,08272  | 0 |
| ZnO     | 24h | 10 | Fe6:ZnO  | 5h  | 20 | -71,00333 | 13,37863 | -5,30722 | 0,00126  | 1 |
| ZnO     | 24h | 10 | Fe6:ZnO  | 24h | 10 | -9,76333  | 13,37863 | -0,72977 | 1        | 0 |
| ZnO     | 24h | 10 | Fe6:ZnO  | 24h | 20 | -40,91333 | 13,37863 | -3,05811 | 0,35661  | 0 |
| ZnO     | 24h | 10 | Fe12:ZnO | 5h  | 10 | -44,10333 | 13,37863 | -3,29655 | 0,20047  | 0 |
| ZnO     | 24h | 10 | Fe12:ZnO | 5h  | 20 | -75,89333 | 13,37863 | -5,67273 | 5,05E-04 | 1 |
| ZnO     | 24h | 10 | Fe12:ZnO | 24h | 10 | -24,35    | 13,37863 | -1,82007 | 1        | 0 |
| ZnO     | 24h | 10 | Fe12:ZnO | 24h | 20 | -59,80667 | 13,37863 | -4,47031 | 0,01054  | 1 |
| ZnO     | 24h | 20 | Fe6:ZnO  | 5h  | 10 | -16,41667 | 13,37863 | -1,22708 | 1        | 0 |
| ZnO     | 24h | 20 | Fe6:ZnO  | 5h  | 20 | -38,52    | 13,37863 | -2,87922 | 0,54471  | 0 |
| ZnO     | 24h | 20 | Fe6:ZnO  | 24h | 10 | 22,72     | 13,37863 | 1,69823  | 1        | 0 |
| ZnO     | 24h | 20 | Fe6:ZnO  | 24h | 20 | -8,43     | 13,37863 | -0,63011 | 1        | 0 |
| ZnO     | 24h | 20 | Fe12:ZnO | 5h  | 10 | -11,62    | 13,37863 | -0,86855 | 1        | 0 |
| ZnO     | 24h | 20 | Fe12:ZnO | 5h  | 20 | -43,41    | 13,37863 | -3,24473 | 0,22743  | 0 |
| ZnO     | 24h | 20 | Fe12:ZnO | 24h | 10 | 8,13333   | 13,37863 | 0,60793  | 1        | 0 |
| ZnO     | 24h | 20 | Fe12:ZnO | 24h | 20 | -27,32333 | 13,37863 | -2,04231 | 1        | 0 |
| Fe6:ZnO | 5h  | 10 | Fe6:ZnO  | 5h  | 20 | -22,10333 | 13,37863 | -1,65214 | 1        | 0 |
| Fe6:ZnO | 5h  | 10 | Fe6:ZnO  | 24h | 10 | 39,13667  | 13,37863 | 2,92531  | 0,48877  | 0 |
| Fe6:ZnO | 5h  | 10 | Fe6:ZnO  | 24h | 20 | 7,98667   | 13,37863 | 0,59697  | 1        | 0 |
| Fe6:ZnO | 5h  | 10 | Fe12:ZnO | 5h  | 10 | 4,79667   | 13,37863 | 0,35853  | 1        | 0 |
| Fe6:ZnO | 5h  | 10 | Fe12:ZnO | 5h  | 20 | -26,99333 | 13,37863 | -2,01765 | 1        | 0 |
| Fe6:ZnO | 5h  | 10 | Fe12:ZnO | 24h | 10 | 24,55     | 13,37863 | 1,83502  | 1        | 0 |
| Fe6:ZnO | 5h  | 10 | Fe12:ZnO | 24h | 20 | -10,90667 | 13,37863 | -0,81523 | 1        | 0 |
| Fe6:ZnO | 5h  | 20 | Fe6:ZnO  | 24h | 10 | 61,24     | 13,37863 | 4,57745  | 0,00803  | 1 |
| Fe6:ZnO | 5h  | 20 | Fe6:ZnO  | 24h | 20 | 30,09     | 13,37863 | 2,24911  | 1        | 0 |

|          |     |    |          |     |    |           |          |          |         |   |
|----------|-----|----|----------|-----|----|-----------|----------|----------|---------|---|
| Fe6:ZnO  | 5h  | 20 | Fe12:ZnO | 5h  | 10 | 26,9      | 13,37863 | 2,01067  | 1       | 0 |
| Fe6:ZnO  | 5h  | 20 | Fe12:ZnO | 5h  | 20 | -4,89     | 13,37863 | -0,36551 | 1       | 0 |
| Fe6:ZnO  | 5h  | 20 | Fe12:ZnO | 24h | 10 | 46,65333  | 13,37863 | 3,48715  | 0,12552 | 0 |
| Fe6:ZnO  | 5h  | 20 | Fe12:ZnO | 24h | 20 | 11,19667  | 13,37863 | 0,83691  | 1       | 0 |
| Fe6:ZnO  | 24h | 10 | Fe6:ZnO  | 24h | 20 | -31,15    | 13,37863 | -2,32834 | 1       | 0 |
| Fe6:ZnO  | 24h | 10 | Fe12:ZnO | 5h  | 10 | -34,34    | 13,37863 | -2,56678 | 1       | 0 |
| Fe6:ZnO  | 24h | 10 | Fe12:ZnO | 5h  | 20 | -66,13    | 13,37863 | -4,94296 | 0,00317 | 1 |
| Fe6:ZnO  | 24h | 10 | Fe12:ZnO | 24h | 10 | -14,58667 | 13,37863 | -1,0903  | 1       | 0 |
| Fe6:ZnO  | 24h | 10 | Fe12:ZnO | 24h | 20 | -50,04333 | 13,37863 | -3,74054 | 0,06681 | 0 |
| Fe6:ZnO  | 24h | 20 | Fe12:ZnO | 5h  | 10 | -3,19     | 13,37863 | -0,23844 | 1       | 0 |
| Fe6:ZnO  | 24h | 20 | Fe12:ZnO | 5h  | 20 | -34,98    | 13,37863 | -2,61462 | 1       | 0 |
| Fe6:ZnO  | 24h | 20 | Fe12:ZnO | 24h | 10 | 16,56333  | 13,37863 | 1,23804  | 1       | 0 |
| Fe6:ZnO  | 24h | 20 | Fe12:ZnO | 24h | 20 | -18,89333 | 13,37863 | -1,4122  | 1       | 0 |
| Fe12:ZnO | 5h  | 10 | Fe12:ZnO | 5h  | 20 | -31,79    | 13,37863 | -2,37618 | 1       | 0 |
| Fe12:ZnO | 5h  | 10 | Fe12:ZnO | 24h | 10 | 19,75333  | 13,37863 | 1,47648  | 1       | 0 |
| Fe12:ZnO | 5h  | 10 | Fe12:ZnO | 24h | 20 | -15,70333 | 13,37863 | -1,17376 | 1       | 0 |
| Fe12:ZnO | 5h  | 20 | Fe12:ZnO | 24h | 10 | 51,54333  | 13,37863 | 3,85266  | 0,05042 | 0 |
| Fe12:ZnO | 5h  | 20 | Fe12:ZnO | 24h | 20 | 16,08667  | 13,37863 | 1,20241  | 1       | 0 |
| Fe12:ZnO | 24h | 10 | Fe12:ZnO | 24h | 20 | -35,45667 | 13,37863 | -2,65025 | 0,92482 | 0 |

Three way ANOVA analysis on ZnO and Fe:ZnO NPs uptake experiments on Daudi cell line(Bonferroni t-test).

| Comparison between factor: Nanoparticle |          |            |         |          |         |     |
|-----------------------------------------|----------|------------|---------|----------|---------|-----|
|                                         |          | Mean Diff. | SEM     | t Value  | Prob    | Sig |
| ZnO                                     | Fe6:ZnO  | -11,90667  | 4,73687 | -2,51361 | 0,05931 | 0   |
| ZnO                                     | Fe12:ZnO | -7,07958   | 5,02421 | -1,40909 | 0,51836 | 0   |
| Fe6:ZnO                                 | Fe12:ZnO | 4,82708    | 5,02421 | 0,96076  | 1       | 0   |

| Comparison between factor: Incubation time |      |            |         |          |          |     |
|--------------------------------------------|------|------------|---------|----------|----------|-----|
|                                            |      | Mean Diff. | SEM     | t Value  | Prob     | Sig |
| 5 h                                        | 24 h | 52,14972   | 4,02557 | 12,95462 | 9,02E-12 | 1   |

| Comparison between factor: Dose (µg/mL) |    |            |         |          |         |     |
|-----------------------------------------|----|------------|---------|----------|---------|-----|
|                                         |    | Mean Diff. | SEM     | t Value  | Prob    | Sig |
| 10                                      | 20 | -6,63083   | 4,02557 | -1,64718 | 0,11373 | 0   |

| All pairwise multiple comparisons |            |              |          |            |              |           |         |          |          |     |
|-----------------------------------|------------|--------------|----------|------------|--------------|-----------|---------|----------|----------|-----|
| NP                                | Incubation | Dose (µg/mL) | NP       | Incubation | Dose (µg/mL) | MeanDiff  | SEM     | t Value  | Prob     | Sig |
| ZnO                               | 5h         | --           | ZnO      | 24h        | --           | 41,205    | 6,69895 | 6,15096  | 5,15E-05 | 1   |
| ZnO                               | 5h         | --           | Fe6:ZnO  | 5h         | --           | -23,68667 | 6,69895 | -3,53588 | 0,02786  | 1   |
| ZnO                               | 5h         | --           | Fe6:ZnO  | 24h        | --           | 41,07833  | 6,69895 | 6,13205  | 5,38E-05 | 1   |
| ZnO                               | 5h         | --           | Fe12:ZnO | 5h         | --           | -11,71667 | 6,69895 | -1,74903 | 1        | 0   |
| ZnO                               | 5h         | --           | Fe12:ZnO | 24h        | --           | 38,7625   | 7,48966 | 5,17547  | 5,17E-04 | 1   |

|          |     |    |          |     |    |           |          |          |          |   |
|----------|-----|----|----------|-----|----|-----------|----------|----------|----------|---|
| ZnO      | 24h | -- | Fe6:ZnO  | 5h  | -- | -64,89167 | 6,69895  | -9,68684 | 3,22E-08 | 1 |
| ZnO      | 24h | -- | Fe6:ZnO  | 24h | -- | -0,12667  | 6,69895  | -0,01891 | 1        | 0 |
| ZnO      | 24h | -- | Fe12:ZnO | 5h  | -- | -52,92167 | 6,69895  | -7,89999 | 1,09E-06 | 1 |
| ZnO      | 24h | -- | Fe12:ZnO | 24h | -- | -2,4425   | 7,48966  | -0,32612 | 1        | 0 |
| Fe6:ZnO  | 5h  | -- | Fe6:ZnO  | 24h | -- | 64,765    | 6,69895  | 9,66793  | 3,34E-08 | 1 |
| Fe6:ZnO  | 5h  | -- | Fe12:ZnO | 5h  | -- | 11,97     | 6,69895  | 1,78685  | 1        | 0 |
| Fe6:ZnO  | 5h  | -- | Fe12:ZnO | 24h | -- | 62,44917  | 7,48966  | 8,33805  | 4,42E-07 | 1 |
| Fe6:ZnO  | 24h | -- | Fe12:ZnO | 5h  | -- | -52,795   | 6,69895  | -7,88108 | 1,13E-06 | 1 |
| Fe6:ZnO  | 24h | -- | Fe12:ZnO | 24h | -- | -2,31583  | 7,48966  | -0,3092  | 1        | 0 |
| Fe12:ZnO | 5h  | -- | Fe12:ZnO | 24h | -- | 50,47917  | 7,48966  | 6,73985  | 1,35E-05 | 1 |
| ZnO      | --  | 10 | ZnO      | --  | 20 | -8,715    | 6,69895  | -1,30095 | 1        | 0 |
| ZnO      | --  | 10 | Fe6:ZnO  | --  | 10 | -12,42833 | 6,69895  | -1,85527 | 1        | 0 |
| ZnO      | --  | 10 | Fe6:ZnO  | --  | 20 | -20,1     | 6,69895  | -3,00047 | 0,09881  | 0 |
| ZnO      | --  | 10 | Fe12:ZnO | --  | 10 | -9,68417  | 7,10531  | -1,36295 | 1        | 0 |
| ZnO      | --  | 10 | Fe12:ZnO | --  | 20 | -13,19    | 7,10531  | -1,85636 | 1,00E+00 | 0 |
| ZnO      | --  | 20 | Fe6:ZnO  | --  | 10 | -3,71333  | 6,69895  | -0,55432 | 1        | 0 |
| ZnO      | --  | 20 | Fe6:ZnO  | --  | 20 | -11,385   | 6,69895  | -1,69952 | 1        | 0 |
| ZnO      | --  | 20 | Fe12:ZnO | --  | 10 | -0,96917  | 7,10531  | -0,1364  | 1        | 0 |
| ZnO      | --  | 20 | Fe12:ZnO | --  | 20 | -4,475    | 7,10531  | -0,62981 | 1        | 0 |
| Fe6:ZnO  | --  | 10 | Fe6:ZnO  | --  | 20 | -7,67167  | 6,69895  | -1,1452  | 1        | 0 |
| Fe6:ZnO  | --  | 10 | Fe12:ZnO | --  | 10 | 2,74417   | 7,10531  | 0,38621  | 1        | 0 |
| Fe6:ZnO  | --  | 10 | Fe12:ZnO | --  | 20 | -0,76167  | 7,10531  | -0,1072  | 1        | 0 |
| Fe6:ZnO  | --  | 20 | Fe12:ZnO | --  | 10 | 10,41583  | 7,10531  | 1,46592  | 1        | 0 |
| Fe6:ZnO  | --  | 20 | Fe12:ZnO | --  | 20 | 6,91      | 7,10531  | 0,97251  | 1        | 0 |
| Fe12:ZnO | --  | 10 | Fe12:ZnO | --  | 20 | -3,50583  | 7,48966  | -0,46809 | 1        | 0 |
| --       | 5h  | 10 | --       | 5h  | 20 | -28,47444 | 5,46967  | -5,20588 | 1,92E-04 | 1 |
| --       | 5h  | 10 | --       | 24h | 10 | 30,30611  | 5,69301  | 5,32339  | 1,45E-04 | 1 |
| --       | 5h  | 10 | --       | 24h | 20 | 45,51889  | 5,69301  | 7,99557  | 3,57E-07 | 1 |
| --       | 5h  | 20 | --       | 24h | 10 | 58,78056  | 5,69301  | 10,32503 | 4,03E-09 | 1 |
| --       | 5h  | 20 | --       | 24h | 20 | 73,99333  | 5,69301  | 12,99721 | 5,07E-11 | 1 |
| --       | 24h | 10 | --       | 24h | 20 | 15,21278  | 5,90792  | 2,57498  | 0,10365  | 0 |
| ZnO      | 5h  | 10 | ZnO      | 5h  | 20 | -30,93    | 9,47375  | -3,26481 | 0,23402  | 0 |
| ZnO      | 5h  | 10 | ZnO      | 24h | 10 | 18,99     | 9,47375  | 2,00449  | 1        | 0 |
| ZnO      | 5h  | 10 | ZnO      | 24h | 20 | 32,49     | 9,47375  | 3,42948  | 0,15817  | 0 |
| ZnO      | 5h  | 10 | Fe6:ZnO  | 5h  | 10 | -24,60333 | 9,47375  | -2,597   | 1        | 0 |
| ZnO      | 5h  | 10 | Fe6:ZnO  | 5h  | 20 | -53,7     | 9,47375  | -5,66829 | 7,01E-04 | 1 |
| ZnO      | 5h  | 10 | Fe6:ZnO  | 24h | 10 | 18,73667  | 9,47375  | 1,97775  | 1        | 0 |
| ZnO      | 5h  | 10 | Fe6:ZnO  | 24h | 20 | 32,49     | 9,47375  | 3,42948  | 0,15817  | 0 |
| ZnO      | 5h  | 10 | Fe12:ZnO | 5h  | 10 | -14,48333 | 9,47375  | -1,52879 | 1        | 0 |
| ZnO      | 5h  | 10 | Fe12:ZnO | 5h  | 20 | -39,88    | 9,47375  | -4,20953 | 0,02387  | 1 |
| ZnO      | 5h  | 10 | Fe12:ZnO | 24h | 10 | 14,105    | 10,59197 | 1,33167  | 1        | 0 |
| ZnO      | 5h  | 10 | Fe12:ZnO | 24h | 20 | 32,49     | 10,59197 | 3,06742  | 0,37211  | 0 |
| ZnO      | 5h  | 20 | ZnO      | 24h | 10 | 49,92     | 9,47375  | 5,2693   | 0,00182  | 1 |
| ZnO      | 5h  | 20 | ZnO      | 24h | 20 | 63,42     | 9,47375  | 6,69429  | 6,56E-05 | 1 |
| ZnO      | 5h  | 20 | Fe6:ZnO  | 5h  | 10 | 6,32667   | 9,47375  | 0,66781  | 1        | 0 |
| ZnO      | 5h  | 20 | Fe6:ZnO  | 5h  | 20 | -22,77    | 9,47375  | -2,40348 | 1        | 0 |

|          |     |    |          |     |    |           |          |           |          |   |
|----------|-----|----|----------|-----|----|-----------|----------|-----------|----------|---|
| ZnO      | 5h  | 20 | Fe6:ZnO  | 24h | 10 | 49,66667  | 9,47375  | 5,24256   | 0,00194  | 1 |
| ZnO      | 5h  | 20 | Fe6:ZnO  | 24h | 20 | 63,42     | 9,47375  | 6,69429   | 6,56E-05 | 1 |
| ZnO      | 5h  | 20 | Fe12:ZnO | 5h  | 10 | 16,44667  | 9,47375  | 1,73603   | 1        | 0 |
| ZnO      | 5h  | 20 | Fe12:ZnO | 5h  | 20 | -8,95     | 9,47375  | -0,94472  | 1        | 0 |
| ZnO      | 5h  | 20 | Fe12:ZnO | 24h | 10 | 45,035    | 10,59197 | 4,2518    | 0,02153  | 1 |
| ZnO      | 5h  | 20 | Fe12:ZnO | 24h | 20 | 63,42     | 10,59197 | 5,98755   | 3,31E-04 | 1 |
| ZnO      | 24h | 10 | ZnO      | 24h | 20 | 13,5      | 9,47375  | 1,42499   | 1        | 0 |
| ZnO      | 24h | 10 | Fe6:ZnO  | 5h  | 10 | -43,59333 | 9,47375  | -4,60149  | 0,00916  | 1 |
| ZnO      | 24h | 10 | Fe6:ZnO  | 5h  | 20 | -72,69    | 9,47375  | -7,67278  | 7,74E-06 | 1 |
| ZnO      | 24h | 10 | Fe6:ZnO  | 24h | 10 | -0,25333  | 9,47375  | -0,02674  | 1        | 0 |
| ZnO      | 24h | 10 | Fe6:ZnO  | 24h | 20 | 13,5      | 9,47375  | 1,42499   | 1        | 0 |
| ZnO      | 24h | 10 | Fe12:ZnO | 5h  | 10 | -33,47333 | 9,47375  | -3,53327  | 0,12333  | 0 |
| ZnO      | 24h | 10 | Fe12:ZnO | 5h  | 20 | -58,87    | 9,47375  | -6,21401  | 1,96E-04 | 1 |
| ZnO      | 24h | 10 | Fe12:ZnO | 24h | 10 | -4,885    | 10,59197 | -0,4612   | 1        | 0 |
| ZnO      | 24h | 10 | Fe12:ZnO | 24h | 20 | 13,5      | 10,59197 | 1,27455   | 1        | 0 |
| ZnO      | 24h | 20 | Fe6:ZnO  | 5h  | 10 | -57,09333 | 9,47375  | -6,02648  | 3,02E-04 | 1 |
| ZnO      | 24h | 20 | Fe6:ZnO  | 5h  | 20 | -86,19    | 9,47375  | -9,09777  | 4,32E-07 | 1 |
| ZnO      | 24h | 20 | Fe6:ZnO  | 24h | 10 | -13,75333 | 9,47375  | -1,45173  | 1        | 0 |
| ZnO      | 24h | 20 | Fe6:ZnO  | 24h | 20 | 1,82E-14  | 9,47375  | 1,92E-15  | 1        | 0 |
| ZnO      | 24h | 20 | Fe12:ZnO | 5h  | 10 | -46,97333 | 9,47375  | -4,95826  | 0,00385  | 1 |
| ZnO      | 24h | 20 | Fe12:ZnO | 5h  | 20 | -72,37    | 9,47375  | -7,639    | 8,31E-06 | 1 |
| ZnO      | 24h | 20 | Fe12:ZnO | 24h | 10 | -18,385   | 10,59197 | -1,73575  | 1        | 0 |
| ZnO      | 24h | 20 | Fe12:ZnO | 24h | 20 | 4,00E-15  | 10,59197 | 3,77E-16  | 1        | 0 |
| Fe6:ZnO  | 5h  | 10 | Fe6:ZnO  | 5h  | 20 | -29,09667 | 9,47375  | -3,07129  | 0,36876  | 0 |
| Fe6:ZnO  | 5h  | 10 | Fe6:ZnO  | 24h | 10 | 43,34     | 9,47375  | 4,57475   | 0,00978  | 1 |
| Fe6:ZnO  | 5h  | 10 | Fe6:ZnO  | 24h | 20 | 57,09333  | 9,47375  | 6,02648   | 3,02E-04 | 1 |
| Fe6:ZnO  | 5h  | 10 | Fe12:ZnO | 5h  | 10 | 10,12     | 9,47375  | 1,06821   | 1        | 0 |
| Fe6:ZnO  | 5h  | 10 | Fe12:ZnO | 5h  | 20 | -15,27667 | 9,47375  | -1,61253  | 1        | 0 |
| Fe6:ZnO  | 5h  | 10 | Fe12:ZnO | 24h | 10 | 38,70833  | 10,59197 | 3,6545    | 0,0921   | 0 |
| Fe6:ZnO  | 5h  | 10 | Fe12:ZnO | 24h | 20 | 57,09333  | 10,59197 | 5,39024   | 0,00136  | 1 |
| Fe6:ZnO  | 5h  | 20 | Fe6:ZnO  | 24h | 10 | 72,43667  | 9,47375  | 7,64604   | 8,19E-06 | 1 |
| Fe6:ZnO  | 5h  | 20 | Fe6:ZnO  | 24h | 20 | 86,19     | 9,47375  | 9,09777   | 4,32E-07 | 1 |
| Fe6:ZnO  | 5h  | 20 | Fe12:ZnO | 5h  | 10 | 39,21667  | 9,47375  | 4,13951   | 0,02832  | 1 |
| Fe6:ZnO  | 5h  | 20 | Fe12:ZnO | 5h  | 20 | 13,82     | 9,47375  | 1,45877   | 1        | 0 |
| Fe6:ZnO  | 5h  | 20 | Fe12:ZnO | 24h | 10 | 67,805    | 10,59197 | 6,40155   | 1,27E-04 | 1 |
| Fe6:ZnO  | 5h  | 20 | Fe12:ZnO | 24h | 20 | 86,19     | 10,59197 | 8,13729   | 2,93E-06 | 1 |
| Fe6:ZnO  | 24h | 10 | Fe6:ZnO  | 24h | 20 | 13,75333  | 9,47375  | 1,45173   | 1        | 0 |
| Fe6:ZnO  | 24h | 10 | Fe12:ZnO | 5h  | 10 | -33,22    | 9,47375  | -3,50653  | 0,13151  | 0 |
| Fe6:ZnO  | 24h | 10 | Fe12:ZnO | 5h  | 20 | -58,61667 | 9,47375  | -6,18727  | 2,08E-04 | 1 |
| Fe6:ZnO  | 24h | 10 | Fe12:ZnO | 24h | 10 | -4,63167  | 10,59197 | -0,43728  | 1        | 0 |
| Fe6:ZnO  | 24h | 10 | Fe12:ZnO | 24h | 20 | 13,75333  | 10,59197 | 1,29847   | 1        | 0 |
| Fe6:ZnO  | 24h | 20 | Fe12:ZnO | 5h  | 10 | -46,97333 | 9,47375  | -4,95826  | 0,00385  | 1 |
| Fe6:ZnO  | 24h | 20 | Fe12:ZnO | 5h  | 20 | -72,37    | 9,47375  | -7,639    | 8,31E-06 | 1 |
| Fe6:ZnO  | 24h | 20 | Fe12:ZnO | 24h | 10 | -18,385   | 10,59197 | -1,73575  | 1        | 0 |
| Fe6:ZnO  | 24h | 20 | Fe12:ZnO | 24h | 20 | -1,42E-14 | 10,59197 | -1,34E-15 | 1        | 0 |
| Fe12:ZnO | 5h  | 10 | Fe12:ZnO | 5h  | 20 | -25,39667 | 9,47375  | -2,68074  | 0,90126  | 0 |



|          |     |    |          |     |    |          |          |         |          |   |
|----------|-----|----|----------|-----|----|----------|----------|---------|----------|---|
| Fe12:ZnO | 5h  | 10 | Fe12:ZnO | 24h | 10 | 28,58833 | 10,59197 | 2,69906 | 0,86502  | 0 |
| Fe12:ZnO | 5h  | 10 | Fe12:ZnO | 24h | 20 | 46,97333 | 10,59197 | 4,4348  | 0,01377  | 1 |
| Fe12:ZnO | 5h  | 20 | Fe12:ZnO | 24h | 10 | 53,985   | 10,59197 | 5,09678 | 0,00275  | 1 |
| Fe12:ZnO | 5h  | 20 | Fe12:ZnO | 24h | 20 | 72,37    | 10,59197 | 6,83253 | 4,81E-05 | 1 |
| Fe12:ZnO | 24h | 10 | Fe12:ZnO | 24h | 20 | 18,385   | 11,60293 | 1,58451 | 1        | 0 |

Two Ways ANOVA on ZnO and Fe-ZnO cytotoxicity on BxPC-3 cell line (Bonferroni t-test).

| Comparison between factor: Nanoparticle |         |            |         |          |         |              |
|-----------------------------------------|---------|------------|---------|----------|---------|--------------|
| NP 1 vs. NP 2                           |         | Mean Diff. | SEM     | t Value  | P       | Sig (P<0.05) |
| Fe6:ZnO                                 | ZnO     | -9,66832   | 8,16696 | -1,18383 | 0,72499 | 0            |
| Fe12:ZnO                                | ZnO     | -17,05455  | 8,16696 | -2,08824 | 0,12452 | 0            |
| Fe12:ZnO                                | Fe6:ZnO | -7,38623   | 8,16696 | -0,9044  | 1       | 0            |

| Comparison between parameter: Dose (µg/mL) |          |           |          |          |            |              |
|--------------------------------------------|----------|-----------|----------|----------|------------|--------------|
| Dose 1 vs. Dose 2                          |          | MeanDiff  | SEM      | t Value  | P          | Sig (P<0.05) |
| 10 µg/ml                                   | 0 µg/ml  | -2,6289   | 10,11297 | -0,25995 | 1          | 0            |
| 20 µg/ml                                   | 0 µg/ml  | -4,95878  | 10,11297 | -0,49034 | 1          | 0            |
| 20 µg/ml                                   | 10 µg/ml | -2,32988  | 10,11297 | -0,23039 | 1          | 0            |
| 30 µg/ml                                   | 0 µg/ml  | -61,65259 | 10,11297 | -6,09639 | 1,19424E-6 | 1            |
| 30 µg/ml                                   | 10 µg/ml | -59,02369 | 10,11297 | -5,83643 | 3,11541E-6 | 1            |
| 30 µg/ml                                   | 20 µg/ml | -56,69381 | 10,11297 | -5,60605 | 7,24222E-6 | 1            |
| 40 µg/ml                                   | 0 µg/ml  | -87,03963 | 11,67746 | -7,45365 | 7,55617E-9 | 1            |
| 40 µg/ml                                   | 10 µg/ml | -84,41072 | 11,67746 | -7,22852 | 1,75286E-8 | 1            |
| 40 µg/ml                                   | 20 µg/ml | -82,08085 | 11,67746 | -7,029   | 3,6966E-8  | 1            |
| 40 µg/ml                                   | 30 µg/ml | -25,38704 | 11,67746 | -2,17402 | 0,34106    | 0            |

| All pairwise multiple comparisons |              |      |              |          |          |          |         |              |
|-----------------------------------|--------------|------|--------------|----------|----------|----------|---------|--------------|
| NP 1                              | Dose (µg/mL) | NP 2 | Dose (µg/mL) | MeanDiff | SEM      | t Value  | P       | Sig (P<0.05) |
| ZnO                               | 10 µg/ml     | ZnO  | 0 µg/ml      | -0,60141 | 17,51618 | -0,03433 | 1       | 0            |
| ZnO                               | 20 µg/ml     | ZnO  | 0 µg/ml      | 4,48506  | 17,51618 | 0,25605  | 1       | 0            |
| ZnO                               | 20 µg/ml     | ZnO  | 10 µg/ml     | 5,08647  | 17,51618 | 0,29039  | 1       | 0            |
| ZnO                               | 30 µg/ml     | ZnO  | 0 µg/ml      | -41,4049 | 17,51618 | -2,36381 | 1       | 0            |
| ZnO                               | 30 µg/ml     | ZnO  | 10 µg/ml     | -40,8035 | 17,51618 | -2,32947 | 1       | 0            |
| ZnO                               | 30 µg/ml     | ZnO  | 20 µg/ml     | -45,89   | 17,51618 | -2,61986 | 1       | 0            |
| ZnO                               | 40 µg/ml     | ZnO  | 0 µg/ml      | -71,6129 | 20,22595 | -3,54064 | 0,08724 | 0            |
| ZnO                               | 40 µg/ml     | ZnO  | 10 µg/ml     | -71,0115 | 20,22595 | -3,51091 | 0,09556 | 0            |

|          |          |         |          |          |          |          |         |   |
|----------|----------|---------|----------|----------|----------|----------|---------|---|
| ZnO      | 40 µg/ml | ZnO     | 20 µg/ml | -76,0979 | 20,22595 | -3,76239 | 0,0437  | 1 |
| ZnO      | 40 µg/ml | ZnO     | 30 µg/ml | -30,208  | 20,22595 | -1,49353 | 1       | 0 |
| Fe6:ZnO  | 0 µg/ml  | ZnO     | 0 µg/ml  | 0        | 17,51618 | 0        | 1       | 0 |
| Fe6:ZnO  | 0 µg/ml  | ZnO     | 10 µg/ml | 0,60141  | 17,51618 | 0,03433  | 1       | 0 |
| Fe6:ZnO  | 0 µg/ml  | ZnO     | 20 µg/ml | -4,48506 | 17,51618 | -0,25605 | 1       | 0 |
| Fe6:ZnO  | 0 µg/ml  | ZnO     | 30 µg/ml | 41,40491 | 17,51618 | 2,36381  | 1       | 0 |
| Fe6:ZnO  | 0 µg/ml  | ZnO     | 40 µg/ml | 71,61287 | 20,22595 | 3,54064  | 0,08724 | 0 |
| Fe6:ZnO  | 10 µg/ml | ZnO     | 0 µg/ml  | -12,9214 | 17,51618 | -0,73768 | 1       | 0 |
| Fe6:ZnO  | 10 µg/ml | ZnO     | 10 µg/ml | -12,32   | 17,51618 | -0,70335 | 1       | 0 |
| Fe6:ZnO  | 10 µg/ml | ZnO     | 20 µg/ml | -17,4065 | 17,51618 | -0,99374 | 1       | 0 |
| Fe6:ZnO  | 10 µg/ml | ZnO     | 30 µg/ml | 28,4835  | 17,51618 | 1,62612  | 1       | 0 |
| Fe6:ZnO  | 10 µg/ml | ZnO     | 40 µg/ml | 58,69146 | 20,22595 | 2,90179  | 0,5628  | 0 |
| Fe6:ZnO  | 10 µg/ml | Fe6:ZnO | 0 µg/ml  | -12,9214 | 17,51618 | -0,73768 | 1       | 0 |
| Fe6:ZnO  | 20 µg/ml | ZnO     | 0 µg/ml  | -2,0716  | 17,51618 | -0,11827 | 1       | 0 |
| Fe6:ZnO  | 20 µg/ml | ZnO     | 10 µg/ml | -1,47019 | 17,51618 | -0,08393 | 1       | 0 |
| Fe6:ZnO  | 20 µg/ml | ZnO     | 20 µg/ml | -6,55666 | 17,51618 | -0,37432 | 1       | 0 |
| Fe6:ZnO  | 20 µg/ml | ZnO     | 30 µg/ml | 39,33332 | 17,51618 | 2,24554  | 1       | 0 |
| Fe6:ZnO  | 20 µg/ml | ZnO     | 40 µg/ml | 69,54128 | 20,22595 | 3,43822  | 0,11919 | 0 |
| Fe6:ZnO  | 20 µg/ml | Fe6:ZnO | 0 µg/ml  | -2,0716  | 17,51618 | -0,11827 | 1       | 0 |
| Fe6:ZnO  | 20 µg/ml | Fe6:ZnO | 10 µg/ml | 10,84981 | 17,51618 | 0,61942  | 1       | 0 |
| Fe6:ZnO  | 30 µg/ml | ZnO     | 0 µg/ml  | -54,3589 | 17,51618 | -3,10335 | 0,3195  | 0 |
| Fe6:ZnO  | 30 µg/ml | ZnO     | 10 µg/ml | -53,7575 | 17,51618 | -3,06902 | 0,35238 | 0 |
| Fe6:ZnO  | 30 µg/ml | ZnO     | 20 µg/ml | -58,8439 | 17,51618 | -3,3594  | 0,15106 | 0 |
| Fe6:ZnO  | 30 µg/ml | ZnO     | 30 µg/ml | -12,954  | 17,51618 | -0,73954 | 1       | 0 |
| Fe6:ZnO  | 30 µg/ml | ZnO     | 40 µg/ml | 17,25401 | 20,22595 | 0,85306  | 1       | 0 |
| Fe6:ZnO  | 30 µg/ml | Fe6:ZnO | 0 µg/ml  | -54,3589 | 17,51618 | -3,10335 | 0,3195  | 0 |
| Fe6:ZnO  | 30 µg/ml | Fe6:ZnO | 10 µg/ml | -41,4375 | 17,51618 | -2,36567 | 1       | 0 |
| Fe6:ZnO  | 30 µg/ml | Fe6:ZnO | 20 µg/ml | -52,2873 | 17,51618 | -2,98508 | 0,44656 | 0 |
| Fe6:ZnO  | 40 µg/ml | ZnO     | 0 µg/ml  | -92,6856 | 20,22595 | -4,58251 | 0,00289 | 1 |
| Fe6:ZnO  | 40 µg/ml | ZnO     | 10 µg/ml | -92,0842 | 20,22595 | -4,55278 | 0,0032  | 1 |
| Fe6:ZnO  | 40 µg/ml | ZnO     | 20 µg/ml | -97,1707 | 20,22595 | -4,80426 | 0,00134 | 1 |
| Fe6:ZnO  | 40 µg/ml | ZnO     | 30 µg/ml | -51,2807 | 20,22595 | -2,53539 | 1       | 0 |
| Fe6:ZnO  | 40 µg/ml | ZnO     | 40 µg/ml | -21,0728 | 22,6133  | -0,93188 | 1       | 0 |
| Fe6:ZnO  | 40 µg/ml | Fe6:ZnO | 0 µg/ml  | -92,6856 | 20,22595 | -4,58251 | 0,00289 | 1 |
| Fe6:ZnO  | 40 µg/ml | Fe6:ZnO | 10 µg/ml | -79,7642 | 20,22595 | -3,94366 | 0,02447 | 1 |
| Fe6:ZnO  | 40 µg/ml | Fe6:ZnO | 20 µg/ml | -90,614  | 20,22595 | -4,48009 | 0,00411 | 1 |
| Fe6:ZnO  | 40 µg/ml | Fe6:ZnO | 30 µg/ml | -38,3268 | 20,22595 | -1,89493 | 1       | 0 |
| Fe12:ZnO | 0 µg/ml  | ZnO     | 0 µg/ml  | 0        | 17,51618 | 0        | 1       | 0 |

|          |          |          |          |          |          |          |          |   |
|----------|----------|----------|----------|----------|----------|----------|----------|---|
| Fe12:ZnO | 0 µg/ml  | ZnO      | 10 µg/ml | 0,60141  | 17,51618 | 0,03433  | 1        | 0 |
| Fe12:ZnO | 0 µg/ml  | ZnO      | 20 µg/ml | -4,48506 | 17,51618 | -0,25605 | 1        | 0 |
| Fe12:ZnO | 0 µg/ml  | ZnO      | 30 µg/ml | 41,40491 | 17,51618 | 2,36381  | 1        | 0 |
| Fe12:ZnO | 0 µg/ml  | ZnO      | 40 µg/ml | 71,61287 | 20,22595 | 3,54064  | 0,08724  | 0 |
| Fe12:ZnO | 0 µg/ml  | Fe6:ZnO  | 0 µg/ml  | 0        | 17,51618 | 0        | 1        | 0 |
| Fe12:ZnO | 0 µg/ml  | Fe6:ZnO  | 10 µg/ml | 12,92141 | 17,51618 | 0,73768  | 1        | 0 |
| Fe12:ZnO | 0 µg/ml  | Fe6:ZnO  | 20 µg/ml | 2,0716   | 17,51618 | 0,11827  | 1        | 0 |
| Fe12:ZnO | 0 µg/ml  | Fe6:ZnO  | 30 µg/ml | 54,35886 | 17,51618 | 3,10335  | 0,3195   | 0 |
| Fe12:ZnO | 0 µg/ml  | Fe6:ZnO  | 40 µg/ml | 92,68564 | 20,22595 | 4,58251  | 0,00289  | 1 |
| Fe12:ZnO | 10 µg/ml | ZnO      | 0 µg/ml  | 5,63611  | 17,51618 | 0,32177  | 1        | 0 |
| Fe12:ZnO | 10 µg/ml | ZnO      | 10 µg/ml | 6,23752  | 17,51618 | 0,3561   | 1        | 0 |
| Fe12:ZnO | 10 µg/ml | ZnO      | 20 µg/ml | 1,15105  | 17,51618 | 0,06571  | 1        | 0 |
| Fe12:ZnO | 10 µg/ml | ZnO      | 30 µg/ml | 47,04103 | 17,51618 | 2,68557  | 1        | 0 |
| Fe12:ZnO | 10 µg/ml | ZnO      | 40 µg/ml | 77,24899 | 20,22595 | 3,8193   | 0,03648  | 1 |
| Fe12:ZnO | 10 µg/ml | Fe6:ZnO  | 0 µg/ml  | 5,63611  | 17,51618 | 0,32177  | 1        | 0 |
| Fe12:ZnO | 10 µg/ml | Fe6:ZnO  | 10 µg/ml | 18,55752 | 17,51618 | 1,05945  | 1        | 0 |
| Fe12:ZnO | 10 µg/ml | Fe6:ZnO  | 20 µg/ml | 7,70771  | 17,51618 | 0,44003  | 1        | 0 |
| Fe12:ZnO | 10 µg/ml | Fe6:ZnO  | 30 µg/ml | 59,99498 | 17,51618 | 3,42512  | 0,12401  | 0 |
| Fe12:ZnO | 10 µg/ml | Fe6:ZnO  | 40 µg/ml | 98,32175 | 20,22595 | 4,86117  | 0,0011   | 1 |
| Fe12:ZnO | 10 µg/ml | Fe12:ZnO | 0 µg/ml  | 5,63611  | 17,51618 | 0,32177  | 1        | 0 |
| Fe12:ZnO | 20 µg/ml | ZnO      | 0 µg/ml  | -17,2898 | 17,51618 | -0,98708 | 1        | 0 |
| Fe12:ZnO | 20 µg/ml | ZnO      | 10 µg/ml | -16,6884 | 17,51618 | -0,95274 | 1        | 0 |
| Fe12:ZnO | 20 µg/ml | ZnO      | 20 µg/ml | -21,7749 | 17,51618 | -1,24313 | 1        | 0 |
| Fe12:ZnO | 20 µg/ml | ZnO      | 30 µg/ml | 24,1151  | 17,51618 | 1,37673  | 1        | 0 |
| Fe12:ZnO | 20 µg/ml | ZnO      | 40 µg/ml | 54,32306 | 20,22595 | 2,68581  | 1        | 0 |
| Fe12:ZnO | 20 µg/ml | Fe6:ZnO  | 0 µg/ml  | -17,2898 | 17,51618 | -0,98708 | 1        | 0 |
| Fe12:ZnO | 20 µg/ml | Fe6:ZnO  | 10 µg/ml | -4,3684  | 17,51618 | -0,24939 | 1        | 0 |
| Fe12:ZnO | 20 µg/ml | Fe6:ZnO  | 20 µg/ml | -15,2182 | 17,51618 | -0,86881 | 1        | 0 |
| Fe12:ZnO | 20 µg/ml | Fe6:ZnO  | 30 µg/ml | 37,06906 | 17,51618 | 2,11627  | 1        | 0 |
| Fe12:ZnO | 20 µg/ml | Fe6:ZnO  | 40 µg/ml | 75,39583 | 20,22595 | 3,72768  | 0,04876  | 1 |
| Fe12:ZnO | 20 µg/ml | Fe12:ZnO | 0 µg/ml  | -17,2898 | 17,51618 | -0,98708 | 1        | 0 |
| Fe12:ZnO | 20 µg/ml | Fe12:ZnO | 10 µg/ml | -22,9259 | 17,51618 | -1,30884 | 1        | 0 |
| Fe12:ZnO | 30 µg/ml | ZnO      | 0 µg/ml  | -89,194  | 17,51618 | -5,09209 | 4,85E-04 | 1 |
| Fe12:ZnO | 30 µg/ml | ZnO      | 10 µg/ml | -88,5926 | 17,51618 | -5,05776 | 5,48E-04 | 1 |
| Fe12:ZnO | 30 µg/ml | ZnO      | 20 µg/ml | -93,6791 | 17,51618 | -5,34814 | 1,94E-04 | 1 |
| Fe12:ZnO | 30 µg/ml | ZnO      | 30 µg/ml | -47,7891 | 17,51618 | -2,72828 | 0,90017  | 0 |
| Fe12:ZnO | 30 µg/ml | ZnO      | 40 µg/ml | -17,5811 | 20,22595 | -0,86924 | 1        | 0 |
| Fe12:ZnO | 30 µg/ml | Fe6:ZnO  | 0 µg/ml  | -89,194  | 17,51618 | -5,09209 | 4,85E-04 | 1 |

|          |          |          |          |          |          |          |          |   |
|----------|----------|----------|----------|----------|----------|----------|----------|---|
| Fe12:ZnO | 30 µg/ml | Fe6:ZnO  | 10 µg/ml | -76,2726 | 17,51618 | -4,35441 | 0,00629  | 1 |
| Fe12:ZnO | 30 µg/ml | Fe6:ZnO  | 20 µg/ml | -87,1224 | 17,51618 | -4,97382 | 7,38E-04 | 1 |
| Fe12:ZnO | 30 µg/ml | Fe6:ZnO  | 30 µg/ml | -34,8351 | 17,51618 | -1,98874 | 1        | 0 |
| Fe12:ZnO | 30 µg/ml | Fe6:ZnO  | 40 µg/ml | 3,49165  | 20,22595 | 0,17263  | 1        | 0 |
| Fe12:ZnO | 30 µg/ml | Fe12:ZnO | 0 µg/ml  | -89,194  | 17,51618 | -5,09209 | 4,85E-04 | 1 |
| Fe12:ZnO | 30 µg/ml | Fe12:ZnO | 10 µg/ml | -94,8301 | 17,51618 | -5,41386 | 1,53E-04 | 1 |
| Fe12:ZnO | 30 µg/ml | Fe12:ZnO | 20 µg/ml | -71,9042 | 17,51618 | -4,10501 | 0,01445  | 1 |
| Fe12:ZnO | 40 µg/ml | ZnO      | 0 µg/ml  | -96,8204 | 20,22595 | -4,78694 | 0,00142  | 1 |
| Fe12:ZnO | 40 µg/ml | ZnO      | 10 µg/ml | -96,219  | 20,22595 | -4,7572  | 0,00158  | 1 |
| Fe12:ZnO | 40 µg/ml | ZnO      | 20 µg/ml | -101,305 | 20,22595 | -5,00869 | 6,53E-04 | 1 |
| Fe12:ZnO | 40 µg/ml | ZnO      | 30 µg/ml | -55,4155 | 20,22595 | -2,73982 | 0,87295  | 0 |
| Fe12:ZnO | 40 µg/ml | ZnO      | 40 µg/ml | -25,2075 | 22,6133  | -1,11472 | 1        | 0 |
| Fe12:ZnO | 40 µg/ml | Fe6:ZnO  | 0 µg/ml  | -96,8204 | 20,22595 | -4,78694 | 0,00142  | 1 |
| Fe12:ZnO | 40 µg/ml | Fe6:ZnO  | 10 µg/ml | -83,899  | 20,22595 | -4,14809 | 0,01254  | 1 |
| Fe12:ZnO | 40 µg/ml | Fe6:ZnO  | 20 µg/ml | -94,7488 | 20,22595 | -4,68452 | 0,00203  | 1 |
| Fe12:ZnO | 40 µg/ml | Fe6:ZnO  | 30 µg/ml | -42,4615 | 20,22595 | -2,09936 | 1        | 0 |
| Fe12:ZnO | 40 µg/ml | Fe6:ZnO  | 40 µg/ml | -4,13473 | 22,6133  | -0,18285 | 1        | 0 |
| Fe12:ZnO | 40 µg/ml | Fe12:ZnO | 0 µg/ml  | -96,8204 | 20,22595 | -4,78694 | 0,00142  | 1 |
| Fe12:ZnO | 40 µg/ml | Fe12:ZnO | 10 µg/ml | -102,456 | 20,22595 | -5,0656  | 5,33E-04 | 1 |
| Fe12:ZnO | 40 µg/ml | Fe12:ZnO | 20 µg/ml | -79,5306 | 20,22595 | -3,93211 | 0,0254   | 1 |
| Fe12:ZnO | 40 µg/ml | Fe12:ZnO | 30 µg/ml | -7,62638 | 20,22595 | -0,37706 | 1        | 0 |

Three way ANOVA analysis on ZnO and Fe:ZnO NPs uptake experiments on BxPC-3 cell line (Bonferroni t-test).

| NP           |          |          |         |          |          |              |
|--------------|----------|----------|---------|----------|----------|--------------|
| NP 1 vs NP 2 |          | MeanDiff | SEM     | t Value  | P        | Sig (P<0,05) |
| ZnO          | Fe6:ZnO  | -46,3283 | 2,47491 | -18,7192 | 2,4E-15  | 1            |
| ZnO          | Fe12:ZnO | -27,8242 | 2,47491 | -11,2425 | 1,43E-10 | 1            |
| Fe6:ZnO      | Fe12:ZnO | 18,50417 | 2,47491 | 7,47669  | 3,07E-07 | 1            |

| Incubation time |      |          |         |          |          |              |
|-----------------|------|----------|---------|----------|----------|--------------|
|                 |      | MeanDiff | SEM     | t Value  | P        | Sig (P<0,05) |
| 5 h             | 24 h | -10,7078 | 2,02076 | -5,29889 | 1,95E-05 | 1            |

| Dose (µg/mL) |          |          |         |          |          |              |
|--------------|----------|----------|---------|----------|----------|--------------|
|              |          | MeanDiff | SEM     | t Value  | P        | Sig (P<0,05) |
| 10 µg/ml     | 20 µg/ml | -29,12   | 2,02076 | -14,4104 | 2,59E-13 | 1            |

| All pairwise multiple comparisons |            |              |          |            |              |          |         |          |          |              |
|-----------------------------------|------------|--------------|----------|------------|--------------|----------|---------|----------|----------|--------------|
| NP                                | Incubation | Dose (µg/mL) | NP       | Incubation | Dose (µg/mL) | MeanDiff | SEM     | t Value  | P        | Sig (P<0,05) |
| ZnO                               | 5 h        | --           | ZnO      | 24 h       | --           | -10,725  | 3,50006 | -3,06424 | 0,07987  | 0            |
| ZnO                               | 5 h        | --           | Fe6:ZnO  | 5 h        | --           | -42,4667 | 3,50006 | -12,1331 | 1,49E-10 | 1            |
| ZnO                               | 5 h        | --           | Fe6:ZnO  | 24 h       | --           | -60,915  | 3,50006 | -17,404  | 6,14E-14 | 1            |
| ZnO                               | 5 h        | --           | Fe12:ZnO | 5 h        | --           | -31,7117 | 3,50006 | -9,06033 | 4,88E-08 | 1            |
| ZnO                               | 5 h        | --           | Fe12:ZnO | 24 h       | --           | -34,6617 | 3,50006 | -9,90317 | 8,91E-09 | 1            |
| ZnO                               | 24 h       | --           | Fe6:ZnO  | 5 h        | --           | -31,7417 | 3,50006 | -9,0689  | 4,80E-08 | 1            |
| ZnO                               | 24 h       | --           | Fe6:ZnO  | 24 h       | --           | -50,19   | 3,50006 | -14,3398 | 4,32E-12 | 1            |
| ZnO                               | 24 h       | --           | Fe12:ZnO | 5 h        | --           | -20,9867 | 3,50006 | -5,99609 | 5,16E-05 | 1            |
| ZnO                               | 24 h       | --           | Fe12:ZnO | 24 h       | --           | -23,9367 | 3,50006 | -6,83893 | 6,75E-06 | 1            |
| Fe6:ZnO                           | 5 h        | --           | Fe6:ZnO  | 24 h       | --           | -18,4483 | 3,50006 | -5,27087 | 3,14E-04 | 1            |
| Fe6:ZnO                           | 5 h        | --           | Fe12:ZnO | 5 h        | --           | 10,755   | 3,50006 | 3,07281  | 0,07825  | 0            |
| Fe6:ZnO                           | 5 h        | --           | Fe12:ZnO | 24 h       | --           | 7,805    | 3,50006 | 2,22996  | 0,53045  | 0            |
| Fe6:ZnO                           | 24 h       | --           | Fe12:ZnO | 5 h        | --           | 29,20333 | 3,50006 | 8,34367  | 2,23E-07 | 1            |
| Fe6:ZnO                           | 24 h       | --           | Fe12:ZnO | 24 h       | --           | 26,25333 | 3,50006 | 7,50083  | 1,45E-06 | 1            |
| Fe12:ZnO                          | 5 h        | --           | Fe12:ZnO | 24 h       | --           | -2,95    | 3,50006 | -0,84284 | 1        | 0            |
| ZnO                               | --         | 10 µg/ml     | ZnO      | --         | 20 µg/ml     | -28,5883 | 3,50006 | -8,16796 | 3,27E-07 | 1            |
| ZnO                               | --         | 10 µg/ml     | Fe6:ZnO  | --         | 10 µg/ml     | -47,02   | 3,50006 | -13,4341 | 1,75E-11 | 1            |
| ZnO                               | --         | 10 µg/ml     | Fe6:ZnO  | --         | 20 µg/ml     | -74,225  | 3,50006 | -21,2068 | 7,08E-16 | 1            |
| ZnO                               | --         | 10 µg/ml     | Fe12:ZnO | --         | 10 µg/ml     | -26,335  | 3,50006 | -7,52416 | 1,38E-06 | 1            |
| ZnO                               | --         | 10 µg/ml     | Fe12:ZnO | --         | 20 µg/ml     | -57,9017 | 3,50006 | -16,5431 | 1,90E-13 | 1            |
| ZnO                               | --         | 20 µg/ml     | Fe6:ZnO  | --         | 10 µg/ml     | -18,4317 | 3,50006 | -5,2661  | 3,18E-04 | 1            |
| ZnO                               | --         | 20 µg/ml     | Fe6:ZnO  | --         | 20 µg/ml     | -45,6367 | 3,50006 | -13,0388 | 3,30E-11 | 1            |
| ZnO                               | --         | 20 µg/ml     | Fe12:ZnO | --         | 10 µg/ml     | 2,25333  | 3,50006 | 0,6438   | 1        | 0            |
| ZnO                               | --         | 20 µg/ml     | Fe12:ZnO | --         | 20 µg/ml     | -29,3133 | 3,50006 | -8,3751  | 2,08E-07 | 1            |
| Fe6:ZnO                           | --         | 10 µg/ml     | Fe6:ZnO  | --         | 20 µg/ml     | -27,205  | 3,50006 | -7,77273 | 7,85E-07 | 1            |
| Fe6:ZnO                           | --         | 10 µg/ml     | Fe12:ZnO | --         | 10 µg/ml     | 20,685   | 3,50006 | 5,9099   | 6,38E-05 | 1            |

|          |      |          |          |      |          |          |         |          |          |   |
|----------|------|----------|----------|------|----------|----------|---------|----------|----------|---|
| Fe6:ZnO  | --   | 10 µg/ml | Fe12:ZnO | --   | 20 µg/ml | -10,8817 | 3,50006 | -3,109   | 0,07175  | 0 |
| Fe6:ZnO  | --   | 20 µg/ml | Fe12:ZnO | --   | 10 µg/ml | 47,89    | 3,50006 | 13,68263 | 1,18E-11 | 1 |
| Fe6:ZnO  | --   | 20 µg/ml | Fe12:ZnO | --   | 20 µg/ml | 16,32333 | 3,50006 | 4,66373  | 0,00146  | 1 |
| Fe12:ZnO | --   | 10 µg/ml | Fe12:ZnO | --   | 20 µg/ml | -31,5667 | 3,50006 | -9,0189  | 5,32E-08 | 1 |
| --       | 5 h  | 10 µg/ml | --       | 5 h  | 20 µg/ml | -28,2189 | 2,85779 | -9,87439 | 3,77E-09 | 1 |
| --       | 5 h  | 10 µg/ml | --       | 24 h | 10 µg/ml | -9,80667 | 2,85779 | -3,43156 | 0,01309  | 1 |
| --       | 5 h  | 10 µg/ml | --       | 24 h | 20 µg/ml | -39,8278 | 2,85779 | -13,9366 | 3,19E-12 | 1 |
| --       | 5 h  | 20 µg/ml | --       | 24 h | 10 µg/ml | 18,41222 | 2,85779 | 6,44283  | 6,95E-06 | 1 |
| --       | 5 h  | 20 µg/ml | --       | 24 h | 20 µg/ml | -11,6089 | 2,85779 | -4,0622  | 0,0027   | 1 |
| --       | 24 h | 10 µg/ml | --       | 24 h | 20 µg/ml | -30,0211 | 2,85779 | -10,505  | 1,12E-09 | 1 |
| ZnO      | 5 h  | 10 µg/ml | ZnO      | 5 h  | 20 µg/ml | -25,2667 | 4,94983 | -5,10455 | 0,00211  | 1 |
| ZnO      | 5 h  | 10 µg/ml | ZnO      | 24 h | 10 µg/ml | -7,40333 | 4,94983 | -1,49567 | 1        | 0 |
| ZnO      | 5 h  | 10 µg/ml | ZnO      | 24 h | 20 µg/ml | -39,3133 | 4,94983 | -7,94236 | 2,37E-06 | 1 |
| ZnO      | 5 h  | 10 µg/ml | Fe6:ZnO  | 5 h  | 10 µg/ml | -40,1367 | 4,94983 | -8,1087  | 1,64E-06 | 1 |
| ZnO      | 5 h  | 10 µg/ml | Fe6:ZnO  | 5 h  | 20 µg/ml | -70,0633 | 4,94983 | -14,1547 | 2,52E-11 | 1 |
| ZnO      | 5 h  | 10 µg/ml | Fe6:ZnO  | 24 h | 10 µg/ml | -61,3067 | 4,94983 | -12,3856 | 4,27E-10 | 1 |
| ZnO      | 5 h  | 10 µg/ml | Fe6:ZnO  | 24 h | 20 µg/ml | -85,79   | 4,94983 | -17,3319 | 2,96E-13 | 1 |
| ZnO      | 5 h  | 10 µg/ml | Fe12:ZnO | 5 h  | 10 µg/ml | -29,6133 | 4,94983 | -5,9827  | 2,35E-04 | 1 |
| ZnO      | 5 h  | 10 µg/ml | Fe12:ZnO | 5 h  | 20 µg/ml | -59,0767 | 4,94983 | -11,9351 | 9,23E-10 | 1 |
| ZnO      | 5 h  | 10 µg/ml | Fe12:ZnO | 24 h | 10 µg/ml | -30,46   | 4,94983 | -6,15375 | 1,54E-04 | 1 |
| ZnO      | 5 h  | 10 µg/ml | Fe12:ZnO | 24 h | 20 µg/ml | -64,13   | 4,94983 | -12,956  | 1,66E-10 | 1 |
| ZnO      | 5 h  | 20 µg/ml | ZnO      | 24 h | 10 µg/ml | 17,86333 | 4,94983 | 3,60888  | 0,09281  | 0 |
| ZnO      | 5 h  | 20 µg/ml | ZnO      | 24 h | 20 µg/ml | -14,0467 | 4,94983 | -2,83781 | 0,60011  | 0 |
| ZnO      | 5 h  | 20 µg/ml | Fe6:ZnO  | 5 h  | 10 µg/ml | -14,87   | 4,94983 | -3,00414 | 0,40556  | 0 |
| ZnO      | 5 h  | 20 µg/ml | Fe6:ZnO  | 5 h  | 20 µg/ml | -44,7967 | 4,94983 | -9,05014 | 2,19E-07 | 1 |
| ZnO      | 5 h  | 20 µg/ml | Fe6:ZnO  | 24 h | 10 µg/ml | -36,04   | 4,94983 | -7,28106 | 1,06E-05 | 1 |
| ZnO      | 5 h  | 20 µg/ml | Fe6:ZnO  | 24 h | 20 µg/ml | -60,5233 | 4,94983 | -12,2274 | 5,59E-10 | 1 |
| ZnO      | 5 h  | 20 µg/ml | Fe12:ZnO | 5 h  | 10 µg/ml | -4,34667 | 4,94983 | -0,87814 | 1        | 0 |
| ZnO      | 5 h  | 20 µg/ml | Fe12:ZnO | 5 h  | 20 µg/ml | -33,81   | 4,94983 | -6,83054 | 3,03E-05 | 1 |
| ZnO      | 5 h  | 20 µg/ml | Fe12:ZnO | 24 h | 10 µg/ml | -5,19333 | 4,94983 | -1,04919 | 1        | 0 |
| ZnO      | 5 h  | 20 µg/ml | Fe12:ZnO | 24 h | 20 µg/ml | -38,8633 | 4,94983 | -7,85145 | 2,90E-06 | 1 |
| ZnO      | 24 h | 10 µg/ml | ZnO      | 24 h | 20 µg/ml | -31,91   | 4,94983 | -6,44669 | 7,58E-05 | 1 |
| ZnO      | 24 h | 10 µg/ml | Fe6:ZnO  | 5 h  | 10 µg/ml | -32,7333 | 4,94983 | -6,61302 | 5,08E-05 | 1 |
| ZnO      | 24 h | 10 µg/ml | Fe6:ZnO  | 5 h  | 20 µg/ml | -62,66   | 4,94983 | -12,659  | 2,71E-10 | 1 |
| ZnO      | 24 h | 10 µg/ml | Fe6:ZnO  | 24 h | 10 µg/ml | -53,9033 | 4,94983 | -10,8899 | 5,98E-09 | 1 |
| ZnO      | 24 h | 10 µg/ml | Fe6:ZnO  | 24 h | 20 µg/ml | -78,3867 | 4,94983 | -15,8362 | 2,19E-12 | 1 |
| ZnO      | 24 h | 10 µg/ml | Fe12:ZnO | 5 h  | 10 µg/ml | -22,21   | 4,94983 | -4,48702 | 0,0101   | 1 |
| ZnO      | 24 h | 10 µg/ml | Fe12:ZnO | 5 h  | 20 µg/ml | -51,6733 | 4,94983 | -10,4394 | 1,39E-08 | 1 |
| ZnO      | 24 h | 10 µg/ml | Fe12:ZnO | 24 h | 10 µg/ml | -23,0567 | 4,94983 | -4,65807 | 0,00654  | 1 |
| ZnO      | 24 h | 10 µg/ml | Fe12:ZnO | 24 h | 20 µg/ml | -56,7267 | 4,94983 | -11,4603 | 2,13E-09 | 1 |
| ZnO      | 24 h | 20 µg/ml | Fe6:ZnO  | 5 h  | 10 µg/ml | -0,82333 | 4,94983 | -0,16634 | 1        | 0 |
| ZnO      | 24 h | 20 µg/ml | Fe6:ZnO  | 5 h  | 20 µg/ml | -30,75   | 4,94983 | -6,21234 | 1,34E-04 | 1 |
| ZnO      | 24 h | 20 µg/ml | Fe6:ZnO  | 24 h | 10 µg/ml | -21,9933 | 4,94983 | -4,44325 | 0,01129  | 1 |
| ZnO      | 24 h | 20 µg/ml | Fe6:ZnO  | 24 h | 20 µg/ml | -46,4767 | 4,94983 | -9,38955 | 1,09E-07 | 1 |
| ZnO      | 24 h | 20 µg/ml | Fe12:ZnO | 5 h  | 10 µg/ml | 9,7      | 4,94983 | 1,95966  | 1        | 0 |
| ZnO      | 24 h | 20 µg/ml | Fe12:ZnO | 5 h  | 20 µg/ml | -19,7633 | 4,94983 | -3,99273 | 0,03542  | 1 |

|          |      |          |          |      |          |          |         |          |          |   |
|----------|------|----------|----------|------|----------|----------|---------|----------|----------|---|
| ZnO      | 24 h | 20 µg/ml | Fe12:ZnO | 24 h | 10 µg/ml | 8,85333  | 4,94983 | 1,78861  | 1        | 0 |
| ZnO      | 24 h | 20 µg/ml | Fe12:ZnO | 24 h | 20 µg/ml | -24,8167 | 4,94983 | -5,01364 | 0,00265  | 1 |
| Fe6:ZnO  | 5 h  | 10 µg/ml | Fe6:ZnO  | 5 h  | 20 µg/ml | -29,9267 | 4,94983 | -6,046   | 2,01E-04 | 1 |
| Fe6:ZnO  | 5 h  | 10 µg/ml | Fe6:ZnO  | 24 h | 10 µg/ml | -21,17   | 4,94983 | -4,27692 | 0,01724  | 1 |
| Fe6:ZnO  | 5 h  | 10 µg/ml | Fe6:ZnO  | 24 h | 20 µg/ml | -45,6533 | 4,94983 | -9,22321 | 1,54E-07 | 1 |
| Fe6:ZnO  | 5 h  | 10 µg/ml | Fe12:ZnO | 5 h  | 10 µg/ml | 10,52333 | 4,94983 | 2,126    | 1        | 0 |
| Fe6:ZnO  | 5 h  | 10 µg/ml | Fe12:ZnO | 5 h  | 20 µg/ml | -18,94   | 4,94983 | -3,82639 | 0,05386  | 0 |
| Fe6:ZnO  | 5 h  | 10 µg/ml | Fe12:ZnO | 24 h | 10 µg/ml | 9,67667  | 4,94983 | 1,95495  | 1        | 0 |
| Fe6:ZnO  | 5 h  | 10 µg/ml | Fe12:ZnO | 24 h | 20 µg/ml | -23,9933 | 4,94983 | -4,84731 | 0,00404  | 1 |
| Fe6:ZnO  | 5 h  | 20 µg/ml | Fe6:ZnO  | 24 h | 10 µg/ml | 8,75667  | 4,94983 | 1,76908  | 1        | 0 |
| Fe6:ZnO  | 5 h  | 20 µg/ml | Fe6:ZnO  | 24 h | 20 µg/ml | -15,7267 | 4,94983 | -3,17721 | 0,26785  | 0 |
| Fe6:ZnO  | 5 h  | 20 µg/ml | Fe12:ZnO | 5 h  | 10 µg/ml | 40,45    | 4,94983 | 8,172    | 1,43E-06 | 1 |
| Fe6:ZnO  | 5 h  | 20 µg/ml | Fe12:ZnO | 5 h  | 20 µg/ml | 10,98667 | 4,94983 | 2,21961  | 1        | 0 |
| Fe6:ZnO  | 5 h  | 20 µg/ml | Fe12:ZnO | 24 h | 10 µg/ml | 39,60333 | 4,94983 | 8,00095  | 2,08E-06 | 1 |
| Fe6:ZnO  | 5 h  | 20 µg/ml | Fe12:ZnO | 24 h | 20 µg/ml | 5,93333  | 4,94983 | 1,19869  | 1        | 0 |
| Fe6:ZnO  | 24 h | 10 µg/ml | Fe6:ZnO  | 24 h | 20 µg/ml | -24,4833 | 4,94983 | -4,9463  | 0,00314  | 1 |
| Fe6:ZnO  | 24 h | 10 µg/ml | Fe12:ZnO | 5 h  | 10 µg/ml | 31,69333 | 4,94983 | 6,40291  | 8,42E-05 | 1 |
| Fe6:ZnO  | 24 h | 10 µg/ml | Fe12:ZnO | 5 h  | 20 µg/ml | 2,23     | 4,94983 | 0,45052  | 1        | 0 |
| Fe6:ZnO  | 24 h | 10 µg/ml | Fe12:ZnO | 24 h | 10 µg/ml | 30,84667 | 4,94983 | 6,23186  | 1,28E-04 | 1 |
| Fe6:ZnO  | 24 h | 10 µg/ml | Fe12:ZnO | 24 h | 20 µg/ml | -2,82333 | 4,94983 | -0,57039 | 1        | 0 |
| Fe6:ZnO  | 24 h | 20 µg/ml | Fe12:ZnO | 5 h  | 10 µg/ml | 56,17667 | 4,94983 | 11,34921 | 2,59E-09 | 1 |
| Fe6:ZnO  | 24 h | 20 µg/ml | Fe12:ZnO | 5 h  | 20 µg/ml | 26,71333 | 4,94983 | 5,39682  | 0,00101  | 1 |
| Fe6:ZnO  | 24 h | 20 µg/ml | Fe12:ZnO | 24 h | 10 µg/ml | 55,33    | 4,94983 | 11,17816 | 3,53E-09 | 1 |
| Fe6:ZnO  | 24 h | 20 µg/ml | Fe12:ZnO | 24 h | 20 µg/ml | 21,66    | 4,94983 | 4,37591  | 0,0134   | 1 |
| Fe12:ZnO | 5 h  | 10 µg/ml | Fe12:ZnO | 5 h  | 20 µg/ml | -29,4633 | 4,94983 | -5,95239 | 2,53E-04 | 1 |
| Fe12:ZnO | 5 h  | 10 µg/ml | Fe12:ZnO | 24 h | 10 µg/ml | -0,84667 | 4,94983 | -0,17105 | 1        | 0 |
| Fe12:ZnO | 5 h  | 10 µg/ml | Fe12:ZnO | 24 h | 20 µg/ml | -34,5167 | 4,94983 | -6,9733  | 2,16E-05 | 1 |
| Fe12:ZnO | 5 h  | 20 µg/ml | Fe12:ZnO | 24 h | 10 µg/ml | 28,61667 | 4,94983 | 5,78134  | 3,86E-04 | 1 |
| Fe12:ZnO | 5 h  | 20 µg/ml | Fe12:ZnO | 24 h | 20 µg/ml | -5,05333 | 4,94983 | -1,02091 | 1        | 0 |
| Fe12:ZnO | 24 h | 10 µg/ml | Fe12:ZnO | 24 h | 20 µg/ml | -33,67   | 4,94983 | -6,80225 | 3,24E-05 | 1 |
